# Supplementary material for: Optimizing SEM-EDX for fast, high-quality and non-destructive elemental analysis of glass
Source: Royal Society of Chemistry journal article supplement (doi:10.1039/d4ja00212a), 2024-01-01
Supplement: d4ja00212a2.pdf [file d4ja00212a2.pdf]

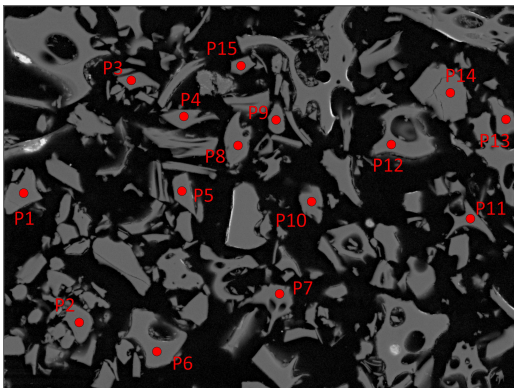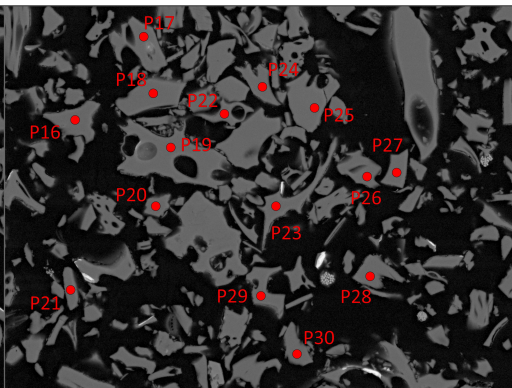

|                  |                      |               |                        |       |
|------------------|----------------------|---------------|------------------------|-------|
|                  | Mag<br>944 x         | FoV<br>300 µm | WD<br>15.00 mm         | 50 µm |
| Speed<br>6       | BC<br>300 pA         | Det<br>LE BSE | Scan Mode<br>ANALYSIS  |       |
| Energy<br>20 keV | File Name<br>TR-8069 | Project       | Est. Current<br>800 pA |       |

|                  |                      |               |                        |       |
|------------------|----------------------|---------------|------------------------|-------|
|                  | Mag<br>944 x         | FoV<br>300 µm | WD<br>15.00 mm         | 50 µm |
| Speed<br>6       | BC<br>300 pA         | Det<br>LE BSE | Scan Mode<br>ANALYSIS  |       |
| Energy<br>20 keV | File Name<br>TR-8070 | Project       | Est. Current<br>800 pA |       |
