# Supplementary material for: Optimizing SEM-EDX for fast, high-quality and non-destructive elemental analysis of glass
Source: Royal Society of Chemistry journal article supplement (doi:10.1039/d4ja00212a), 2024-01-01
Supplement: d4ja00212a5.xlsx [file d4ja00212a5.xlsx]

## Sheet: Glass Chemistries
Name	Rhyolitic glass	Rhyolitic glass	Rhyolitic glass	Rhyolitic glass	Andesitic glass	Tonalitic glass	Basaltic glass	Basaltic glass	Basaltic glass	Komatiitic glass
Catalog Number	NMNH 72854	MINM25-53 Obsidian	ATHO-G	Lipari Obsidian ID3506	StHs6/80-G	TG-1	NMNH 113716-1	NMNH 113498-1	NMNH VG-2	GOR-132-G
Al2O3	12.06	13.03	12.2	13.1	17.8	17.1	15.39	12.5	14.06	11
CaO	0.5	0.88	1.7	0.73	5.28	7.1	11.31	9.3	11.12	8.45
Cl	0.13			0.34					0.03
FeO	1.16	0.76	3.27	1.55	4.37	6.44	9.12783	13.3	11.837	10.1
H2O	0.12
H2O-									0.02
K2O	4.89	4.31	2.64	5.1	1.29	1.96		0.82	0.19
MgO	<0.10	0.1	0.103	0.041	1.97	3.75	8.21	5.08	6.95	22.4
MnO	0.03	0.05	0.106	0.065	0.076	0.127	0.17	0.15	0.22	0.154
Na2O	3.75	3.74	3.75	4.07	4.44	3.13	2.48	2.66	2.62	0.83
NiO										0.1187
P2O5	<0.01		0.025		0.164	0.168	0.12	0.38	0.2
SiO2	76.71	76.29	75.6	74.1	63.7	58.6	51.52	50.94	50.81	45.5
SO2							0.299664	0.0399552	0.349608
TiO2	0.12	0.11	0.255	0.074	0.703	0.755	1.3	4.06	1.85	0.306
Subtotal	99.59	99.27	99.649	99.17	99.793	99.13	99.9275	99.23		98.8587
Total	99.56								100.1
Ref	Jarosewich et al., 1980	MINM-35-53	Jochum et al., 2011	Kuehn et al., 2011	Jochum et al., 2011	Jochum et al., 2011	Jarosewich et al., 1980	Jarosewich et al., 1980	Jarosewich et al., 1980	Jochum et al., 2011

## Sheet: Astimex Standard Mount
Mineral	Apatite	Chromite	Diopside	Kaersutite	Magnetite	Olivine	Orthoclase	Pentlandite	Rhodonite	Rutile	Tugtupite
Location	Wilberforce, Ontario, Canada	New South Wales, Australia	Wakefield, Quebec, Canada	Kangerdlugssuaq, E. Greenland	locality unknown	mantle nodule	Madagascar	Sudbury Ingenous Complex	B.C. Canada	synthetic, CERAC Inc. USA	Greenland
Al2O3		23.56	0.62	11.91			16.74				10.89
BaO2							0.05
BeO											5.22
CaO	54.68		24.8	11.4					4.63
Ce2O3	0.29
Cl											7.574
Co								0.43
Cr2O3		45.42
F	2.99			0.14
FeO		12.91	0.83	11.29	99.34	8.17	2.01		4.34
Fe								30.88
H2O	0.2			2.05
K2O				1.01			15.49
La2O3	0.14
MgO		16.78	17.76	12.67		50.44			1.95
MnO				0.16	0.24	0.115			42.3
Na2O			0.41	2.62			0.67				25.63
Nd2O3	0.14
NiO		0.16				0.354
Ni								35.61
P2O5	40.87
Pr2O3	0.05
SO3	0.39
S								32.89
SiO2	0.04	0.14	55.34	41.49	0.03	41.01	64.8		46.78		51.24
SrO	0.28
TiO2		0.12		5.03						100
V2O3		0.16
Y2O3	0.06
ZnO		0.04
Total	100.13	99.29	99.76	99.77	99.61	100.089	99.76	99.8	100	100	100.554

## Sheet: Counts
Counts	10k	10k	10k	10k	10k	10k	10k	10k	10k	10k	20k	20k	20k	20k	20k	20k	20k	20k	20k	20k	50k	50k	50k	50k	50k	50k	50k	50k	50k	50k	100k	100k	100k	100k	100k	100k	100k	100k	100k	100k	200k	200k	200k	200k	200k	200k	200k	200k	200k
Sample name	11a	11b	11c	11d	11e	11f	11g	11h	11i	11j	12a	12b	12c	12d	12e	12f	12g	12h	12i	12j	13a	13b	13c	13d	13e	13f	13g	13h	13i	13j	14a	14b	14c	14d	14e	14f	14g	14h	14i	14j	15a	15b	15c	15d	15e	15f	15g	15h	15i
SiO2	75.81	75.17	77.56	76.76	77.61	75.72	76.6	75.21	78.07	74.87	77.03	76.18	76.98	78.71	76.28	77.37	77.22	77.33	75.44	76.62	77.46	76.94	76.45	76.99	76.35	77.31	76.42	77.88	78.16	77.34	77.96	76.23	77.2	77.42	77	77.5	78.12	77.27	77.28	77.34	77.41	77.83	77.56	77.42	77.54	76.91	77.02	76.98	77.56
Al2O3	11.49	12.09	12.21	12.61	11.58	11.95	11.67	11.56	11.91	12.04	12.01	12.02	11.73	12.07	12.15	11.8	11.93	12.36	11.8	11.91	11.85	11.99	12.18	12.41	11.99	12.15	12.58	12.06	12.19	11.66	12.24	11.83	12.56	11.9	12.17	11.88	12.22	12.25	12.17	12.38	12.19	12.37	12.13	12.39	12.19	12.08	12.02	12.11	12.01
K2O	4.92	5.46	4.89	4.63	5.22	4.81	4.94	4.79	4.92	4.93	4.9	4.82	4.84	4.78	4.73	4.83	4.88	5.22	4.58	4.79	4.89	4.94	4.92	4.65	5.3	4.83	4.93	4.92	4.95	5.02	4.93	5.02	5.1	5.06	5.03	5.17	4.9	5.06	4.89	4.89	5.02	4.96	4.85	4.89	5.01	4.84	5.07	4.9	4.83
Na2O	3.96	3.4	3.62	3.66	3.81	3.65	3.58	3.36	3.86	3.84	3.66	3.57	2.99	3.47	3.33	3.9	3.8	3.44	3.53	3.35	3.33	3.37	3.38	3.45	3.44	3.42	3.44	3.45	3.66	3.43	3.55	3.37	3.57	3.49	3.11	3.39	3.26	3.19	3.51	3.22	3.25	3.06	3.31	3.33	3.04	3.17	3.29	3.08	3.06
FeO(t)	1.5	1.08	0.95	1.03	1.7	1.07	1.47	0	1.35	0	1.42	1.03	0.99	0.92	1.14	1.47	1.17	0.88	0.85	1.24	1.26	1.1	1.21	1.18	1.17	1.29	0.94	1.47	1.06	1.47	1.07	1.19	1	0.95	1.17	1.16	1.12	1.23	1.1	1.18	1.21	1.16	1.27	1.26	1.11	1.11	1.11	1.12	1.14
CaO	0	0	0	0	0	0	0	0	0	0	0	0	0	0	0	0	0	0	0	0	0	0.43	0	0	0.52	0	0.58	0.65	0	0.4	0.43	0.44	0.44	0.4	0.36	0.49	0.53	0.49	0.36	0.43	0.54	0.43	0.47	0.36	0.45	0.43	0.57	0.43	0.44
Cl	0	0	0	0	0	0	0	0	0	0	0	0	0	0	0	0	0	0	0	0	0	0	0	0	0	0	0	0	0	0	0	0	0	0	0	0	0	0	0	0.19	0	0	0.15	0	0.14	0	0	0	0
TiO2	0	0	0	0	0	0	0	0	0	0	0	0	0	0	0	0	0	0	0	0	0	0	0	0	0	0	0	0	0	0	0	0	0	0	0	0	0	0	0	0	0	0	0	0	0	0	0	0	0
MgO	0	0	0	0	0	0	0	0	0	0	0	0	0	0	0	0	0	0	0	0	0	0	0	0	0	0	0	0	0	0	0	0	0	0	0	0	0	0	0	0	0	0	0	0	0	0	0	0	0
MnO	0	0	0	0	0	0	0	0	0	0	0	0	0	0	0	0	0	0	0	0	0	0	0	0	0	0	0	0	0	0	0	0	0	0	0	0	0	0	0	0	0	0	0	0	0	0	0	0	0
P2O5	0	0	0	0	0	0	0	0	0	0	0	0	0	0	0	0	0	0	0	0	0	0	0	0	0	0	0	0	0	0	0	0	0	0	0	0	0	0	0	0	0	0	0	0	0	0	0	0	0
Total	97.68	97.2	99.23	98.69	99.92	97.2	98.26	94.92	100.11	95.68	99.02	97.62	97.53	99.95	97.63	99.37	99	99.23	96.2	97.91	98.79	98.77	98.14	98.68	98.77	99	98.89	100.43	100.02	99.32	100.18	98.08	99.87	99.22	98.84	99.59	100.15	99.49	99.31	99.63	99.62	99.81	99.74	99.65	99.48	98.54	99.08	98.62	99.04
[truncated: 51 more columns]

## Sheet: Scanning Area
Scanning Field of View		0.1 micron	1 micron	5 micron	10 micron	50 micron		0.1 micron	0.1 micron	0.1 micron	0.1 micron	0.1 micron	0.1 micron	0.1 micron	0.1 micron	0.1 micron	0.1 micron	1 micron	1 micron	1 micron	1 micron	1 micron	1 micron	1 micron	1 micron	1 micron	1 micron	5 micron	5 micron	5 micron	5 micron	5 micron	5 micron	5 micron	5 micron	5 micron	5 micron	10 micron	10 micron	10 micron	10 micron	10 micron	10 micron	10 micron	10 micron	10 micron	10 micron	50 micron	50 micron
Glass	Jarowich et al., 1980	VG-2	VG-2	VG-2	VG-2	VG-2		21a	21b	21c	21d	21e	21f	21g	21h	21i	21j	22a	22b	22c	22d	22e	22f	22g	22h	22i	22j	23a	23b	23c	23d	23e	23f	23g	23h	23i	23j	24a	24b	24c	24d	24e	24f	24g	24h	24i	24j	25a	25b
SiO2	50.81	50.931	50.932	50.908	51.061	51.134		50.8	50.72	51	50.93	51.12	50.98	50.79	50.88	50.88	51.21	50.95	50.89	51.09	51	50.81	50.79	50.98	50.75	51.01	51.05	50.83	50.92	50.8	50.82	51.1	51.07	51.07	50.94	50.93	50.6	51.07	51.08	51.07	50.93	50.96	51.06	51.22	51.12	51.08	51.02	51.23	51.31
Al2O3	14.06	13.833	13.855	13.825	13.843	13.92		13.77	13.81	13.81	13.82	13.94	13.74	13.83	13.8	13.94	13.87	13.86	13.79	13.85	13.94	13.97	13.89	13.89	13.86	13.67	13.83	13.93	13.88	13.8	13.79	13.83	13.98	13.79	13.83	13.8	13.62	13.81	13.84	13.96	13.76	13.79	13.77	13.84	13.9	13.8	13.96	13.88	13.81
FeO(t)	11.837	11.927	11.915	11.921	11.974	11.95		11.87	11.9	11.98	11.87	11.94	12.05	11.9	11.91	11.83	12.02	11.96	11.96	11.99	11.92	11.95	11.97	11.94	11.8	11.91	11.75	12.05	12.09	11.96	11.81	11.89	12.01	11.85	11.92	11.88	11.75	12	12	11.88	12.11	12.04	11.8	11.93	12.02	12.06	11.9	12.08	11.95
CaO	11.12	10.958	10.946	10.963	10.967	11.014		10.85	10.9	10.89	10.98	10.93	10.95	11.09	10.99	11	11	10.84	10.97	10.92	10.99	10.95	11.04	11.02	10.91	10.88	10.94	11.01	10.93	10.83	10.95	11.01	11.03	11.04	11.02	10.96	10.85	10.93	10.97	10.97	11.03	10.9	10.95	11.06	10.99	10.95	10.92	11.02	11.02
MgO	6.95	6.781	6.814	6.829	6.852	6.858		6.79	6.68	6.72	6.8	6.79	6.81	6.72	6.8	6.8	6.9	6.86	6.81	6.85	6.83	6.82	6.86	6.79	6.79	6.73	6.8	6.86	6.77	6.84	6.76	6.88	6.9	6.88	6.81	6.85	6.74	6.81	6.81	6.88	6.84	6.88	6.85	6.87	6.88	6.87	6.83	6.85	6.98
Na2O	2.62	2.676	2.732	2.738	2.741	2.734		2.66	2.73	2.69	2.68	2.6	2.68	2.63	2.73	2.63	2.73	2.75	2.72	2.77	2.81	2.65	2.74	2.74	2.67	2.71	2.76	2.78	2.76	2.65	2.74	2.8	2.72	2.77	2.74	2.73	2.69	2.78	2.75	2.76	2.73	2.64	2.71	2.81	2.73	2.77	2.73	2.79	2.7
TiO2	1.85	1.932	1.907	1.891	1.884	1.912		1.94	1.94	1.97	1.93	1.88	1.92	1.98	1.88	1.9	1.98	1.92	1.84	1.89	1.92	1.89	1.97	1.89	1.97	1.87	1.91	1.98	1.88	1.86	1.85	1.87	1.86	1.93	1.92	1.89	1.87	1.86	1.91	1.92	1.89	1.88	1.89	1.87	1.91	1.86	1.85	1.93	1.89
SO2	0.349608	0.372	0.362	0.395	0.391	0.399		0.35	0.35	0.39	0.37	0.32	0.36	0.41	0.36	0.39	0.42	0.37	0.3	0.38	0.4	0.31	0.36	0.38	0.37	0.38	0.37	0.38	0.42	0.36	0.44	0.38	0.46	0.33	0.4	0.38	0.4	0.41	0.43	0.39	0.37	0.43	0.35	0.41	0.39	0.39	0.34	0.42	0.4
MnO	0.22	0.207	0.227	0.188	0.213	0.198		0.23	0.2	0.21	0.16	0.19	0.24	0.23	0.17	0.24	0.2	0.24	0.24	0.23	0.24	0.18	0.21	0.23	0.25	0.19	0.26	0.16	0.21	0.22	0.22	0.19	0.19	0.22	0.17	0.17	0.13	0.16	0.15	0.24	0.22	0.25	0.23	0.23	0.22	0.18	0.25	0.25	0.21
P2O5	0.2	0.246	0.243	0.24	0.232	0.247		0.21	0.35	0.23	0.31	0.24	0.17	0.2	0.38	0.18	0.19	0.25	0.28	0.24	0.26	0.22	0.2	0.25	0.24	0.25	0.24	0.22	0.26	0.24	0.26	0.23	0.25	0.22	0.17	0.23	0.32	0.19	0.22	0.28	0.29	0.23	0.27	0.28	0.14	0.21	0.21	0.25	0.27
K2O	0.19	0.193	0.192	0.19	0.196	0.195		0.19	0.21	0.2	0.22	0.17	0.18	0.19	0.19	0.2	0.18	0.18	0.16	0.21	0.2	0.19	0.21	0.19	0.18	0.2	0.2	0.22	0.19	0.2	0.2	0.2	0.18	0.16	0.18	0.2	0.17	0.15	0.19	0.2	0.21	0.2	0.23	0.2	0.21	0.17	0.2	0.18	0.22
Cr2O3	0.01	0.07	0.088	0.098	0.091	0.09		0.03	0.08	0.05	0.08	0.07	0.08	0.07	0.11	0.04	0.09	0.05	0.08	0.12	0.05	0.11	0.08	0.1	0.09	0.07	0.13	0.04	0.14	0.13	0.08	0.07	0.05	0.08	0.14	0.14	0.11	0.03	0.07	0.13	0.09	0.11	0.06	0.08	0.1	0.13	0.11	0.1	0.1
Cl	0.01	0.024	0.028	0.033	0.036	0.023		0.03	0.01	0	0.05	0.01	0.03	0.02	0.03	0.02	0.04	0.02	0.01	0.01	0.02	0.02	0.05	0.02	0.08	0.02	0.03	0.04	0.02	0.01	0.05	0.04	0.03	0.02	0.03	0.03	0.06	0.05	0.03	0.02	0.03	0.04	0.06	0.04	0.03	0.04	0.02	0	0.05
Total	100.207	100.15	100.241	100.219	100.481	100.674		99.72	99.88	100.14	100.2	100.2	100.19	100.06	100.23	100.05	100.83	100.25	100.05	100.55	100.58	100.07	100.37	100.42	99.96	99.89	100.27	100.5	100.47	99.9	99.97	100.49	100.73	100.36	100.27	100.19	99.31	100.25	100.45	100.7	100.5	100.35	100.23	100.84	100.64	100.51	100.34	100.98	100.91
Glass	Jarowich et al., 1980	72954	72954	72954	72954	72954		26a	26b	26c	26d	26e	26f	26g	26h	26i	26j	27a	27b	27c	27d	27e	27f	27g	27h	27i	27j	28a	28b	28c	28d	28e	28f	28g	28h	28i	28j	29a	29b	29c	29d	29e	29f	29g	29h	29i	29j	30a	30b
SiO2	76.71	77.805	77.754	77.806	77.815	77.897		77.91	78.15	77.5	77.99	77.91	77.81	77.71	77.93	77.78	77.36	77.76	77.57	77.78	77.71	77.99	77.85	77.8	77.75	77.67	77.66	77.71	77.79	77.77	77.81	77.88	77.9	77.81	77.68	77.68	78.03	78.17	77.65	77.78	78.02	77.62	77.93	77.5	77.7	77.85	77.93	77.98	77.99
Al2O3	12.06	12.13	12.143	12.152	12.192	12.185		12.21	12.15	12.11	12.18	12.12	12.02	12.11	12.22	12.05	12.13	12.09	12.13	12.19	12.13	12.25	12.23	12.09	12.1	12.17	12.05	12.14	12.17	12.21	12.13	12.13	12.24	12.04	12.16	12.12	12.18	12.24	12.11	12.2	12.21	12.16	12.3	12.09	12.2	12.22	12.19	12.13	12.23
K2O	4.89	4.781	4.938	4.953	4.98	4.99		4.8	4.81	4.77	4.78	4.77	4.83	4.83	4.71	4.76	4.75	4.94	4.93	4.95	4.95	4.93	4.95	4.88	4.92	4.96	4.97	4.92	4.94	4.94	4.92	4.93	4.96	5.01	4.97	5.04	4.9	5.07	5.02	4.96	4.95	5.01	4.93	4.88	4.98	5	5	4.97	4.99
Na2O	3.75	3.152	3.695	3.758	3.839	3.784		3.2	3.09	3.16	3.11	3.13	3.14	3.21	3.21	3.13	3.14	3.67	3.63	3.78	3.77	3.63	3.6	3.68	3.75	3.7	3.74	3.74	3.7	3.74	3.72	3.84	3.8	3.73	3.8	3.76	3.75	3.8	3.79	3.76	3.81	3.81	3.82	4.07	3.82	3.78	3.93	3.8	3.76
FeO(t)	1.16	1.078	1.119	1.114	1.074	1.049		0.94	0.96	1.01	1.14	1.11	1.09	1.07	1.13	1.15	1.18	1.12	1.1	1.2	1.15	1.13	1.04	1.15	1.1	1.12	1.08	1.12	1.05	1.12	1.11	1.07	1.14	1.17	1.13	1.14	1.09	0.91	1.08	1.17	1.03	1.13	1.12	1.13	1.08	1.08	1.01	1.04	0.96
CaO	0.5	0.422	0.455	0.462	0.463	0.44		0.45	0.41	0.4	0.41	0.44	0.43	0.45	0.41	0.38	0.44	0.41	0.48	0.47	0.46	0.5	0.39	0.46	0.45	0.47	0.46	0.43	0.47	0.45	0.44	0.47	0.45	0.48	0.5	0.48	0.45	0.44	0.48	0.47	0.45	0.46	0.46	0.52	0.46	0.45	0.44	0.41	0.42
Cl	0.13	0.093	0.106	0.097	0.094	0.091		0.09	0.08	0.1	0.1	0.09	0.07	0.11	0.09	0.1	0.1	0.09	0.11	0.12	0.11	0.11	0.12	0.1	0.1	0.11	0.09	0.11	0.09	0.09	0.11	0.11	0.1	0.11	0.09	0.08	0.08	0.09	0.11	0.08	0.11	0.11	0.09	0.09	0.08	0.11	0.07	0.09	0.07
TiO2	0.12	0.076	0.053	0.096	0.068	0.062		0.05	0.09	0.07	0.12	0.07	0.08	0.05	0.09	0.07	0.07	0.04	0.03	0.09	0.11	0.08	0.01	0.01	0.02	0.06	0.08	0.07	0.08	0.09	0.11	0.13	0.14	0.13	0.02	0.09	0.1	0.08	0.04	0.09	0.07	0.08	0.05	0.04	0.06	0.05	0.12	0.02	0.09
MgO	0.09	0.035	0.0411111	0.034	0.038	0.037		0.01	0.02	0.08	0.05	0.04	0.01	0.05	0	0.03	0.06	0.04	0.05	0.02	0.08	0.02	0.1	0.01		0	0.05	0.05	0.04	0.03	0.04	0.04	0.02	0.03	0.01	0.05	0.03	0.03	0.07	0.05	0.03	0.04	0.04	0.02	0.04	0.04	0.02	0.1	0.02
MnO	0.03	0.03	0.03	0.027	0.0244444	0.04		0.04		0.01	0.01	0.08	0.05	0	0.03	0.05	0	0.05	0.06	0	0.02		0.06	0.04	0	0.01		0.04	0.01	0.05	0.04	0.03	0	0.03	0	0.04	0.03	0	0.01	0.04	0.01		0.03	0.01	0.05	0.04	0.03	0.03
P2O5	0.009	0.066	0.0677778	0.0555556	0.04	0.03		0.09	0.09	0.07	0.01	0.07	0.06	0.05	0.09	0.03	0.1		0	0.08	0.09	0.06	0.14	0.07	0.09	0.02	0.06	0.04	0.07	0.05	0.1	0.05		0.05	0.05	0.07	0.02	0.04	0	0	0.03	0.06	0.05	0.03	0.09	0.1	0	0.02	0.02
Total	99.449	99.668	100.402	100.555	100.627	100.605		99.79	99.85	99.28	99.9	99.83	99.59	99.64	99.91	99.53	99.33	100.21	100.09	100.68	100.58	100.7	100.49	100.29	100.28	100.29	100.24	100.37	100.41	100.54	100.53	100.68	100.75	100.59	100.41	100.55	100.66	100.87	100.36	100.6	100.72	100.48	100.82	100.38	100.56	100.72	100.74	100.59	100.55
[truncated: 8 more columns]

## Sheet: Precision and Analysis
					Precision			Accuracy		Oxide wt%																										Precision
NMNH VG-2	Published	This Study	This Study		This Study	This Study		This Study
Sample ID		Mean	2SD		Mean	2SD		Mean		7a	7b	7c	7d	7e	7f	7g	7h	7i	7j	31a	31b	31c	31d	31e	31f	31g	31h	31i	31j	31k	31m	31n	31o	31p		7a	7b	7c	7d	7e	7f	7g	7h	7i	7j	31a	31b	31c	31d
SiO2	50.81	50.6896	0.257778		0.253789	0.013846		-0.236961		50.89	50.9	50.82	50.51	50.62	50.59	50.69	50.75	50.36	50.59	50.58	50.71	50.78	50.71	50.8	50.65	50.92	50.65	50.58	50.8	50.71	50.65	50.74	50.63	50.61		0.26092	0.262095	0.254191	0.258642	0.250585	0.252096	0.249134	0.250227	0.279873	0.252096	0.252716	0.249258	0.251577	0.249258
Al2O3	14.06	13.8424	0.113912		0.41066	0.0239455		-1.54765		14	13.86	13.81	13.83	13.92	13.84	13.9	13.91	13.79	13.84	13.85	13.87	13.8	13.84	13.86	13.75	13.78	13.77	13.83	13.8	13.81	13.88	13.76	13.87	13.89		0.460852	0.403919	0.405753	0.403531	0.41787	0.403162	0.411325	0.414368	0.409927	0.403162	0.403292	0.40504	0.407599	0.403162
FeO(t)	11.837	11.77	0.149555		0.633984	0.0436047		-0.56619		11.73	11.83	11.77	11.55	11.86	11.77	11.79	11.81	11.76	11.74	11.74	11.69	11.82	11.64	11.79	11.75	11.84	11.8	11.92	11.85	11.75	11.76	11.83	11.73	11.73		0.626044	0.630463	0.622486	0.722402	0.640295	0.622486	0.623378	0.626044	0.622709	0.62449	0.62449	0.636599	0.628037	0.659097
CaO	11.12	10.924	0.11431		0.52222	0.0278731		-1.76259		10.91	11.01	11	10.98	10.88	10.9	10.92	11	10.94	10.88	10.92	10.9	10.93	11.07	10.98	10.96	10.87	10.88	10.82	10.91	10.91	10.86	10.9	10.91	10.86		0.513249	0.535378	0.530479	0.522398	0.518683	0.51444	0.512683	0.530479	0.513437	0.518683	0.512683	0.51444	0.512746	0.575755
MgO	6.95	6.822	0.112694		0.824464	0.0394277		-1.84173		6.85	6.8	6.82	6.79	6.85	6.84	6.77	6.79	6.71	6.83	6.81	6.86	6.86	6.73	6.73	6.83	6.91	6.94	6.85	6.82	6.78	6.87	6.89	6.86	6.76		0.813268	0.811742	0.809295	0.814486	0.813268	0.810927	0.822965	0.814486	0.870972	0.809601	0.810009	0.816614	0.816614	0.851395
Na2O	2.62	2.6928	0.0865101		1.60356	0.0621361		2.77863		2.73	2.7	2.77	2.7	2.7	2.76	2.63	2.66	2.7	2.71	2.72	2.74	2.74	2.67	2.73	2.65	2.69	2.65	2.72	2.73	2.67	2.63	2.64	2.61	2.67		1.59702	1.57474	1.67128	1.57474	1.57474	1.64821	1.63898	1.59189	1.57474	1.57885	1.58629	1.61097	1.61097	1.5826
TiO2	1.85	1.8856	0.0600222		1.58862	0.0830374		1.92432		1.87	1.89	1.86	1.89	1.85	1.9	1.88	1.89	1.88	1.88	1.88	1.88	1.86	1.96	1.87	1.92	1.91	1.91	1.93	1.91	1.92	1.84	1.85	1.83	1.88		1.56786	1.56011	1.58201	1.56011	1.60279	1.56661	1.56053	1.56011	1.56053	1.56053	1.56053	1.56053	1.58201	1.74087
SO2	0.349608	0.3748	0.0772701		10.2894	0.502284		7.20578		0.37	0.36	0.33	0.33	0.39	0.36	0.39	0.43	0.34	0.42	0.35	0.34	0.39	0.37	0.41	0.44	0.34	0.38	0.43	0.38	0.39	0.34	0.42	0.39	0.28		10.103	10.1296	10.3684	10.3684	10.1312	10.1296	10.1312	10.5048	10.2627	10.3731	10.1829	10.2627	10.1312	10.103
MnO	0.22	0.2116	0.0464327		10.949	0.737056		-3.81818		0.2	0.22	0.21	0.22	0.24	0.25	0.18	0.17	0.21	0.2	0.22	0.21	0.22	0.19	0.21	0.19	0.21	0.22	0.24	0.2	0.2	0.19	0.28	0.21	0.2		10.8038	10.7783	10.7512	10.7783	11.0677	11.324	11.142	11.4206	10.7512	10.8038	10.7783	10.7512	10.7783	10.935
P2O5	0.2	0.1952	0.101836		26.0132	2.62563		-2.4		0.24	0.24	0.17	0.23	0.21	0.23	0.24	0.22	0.19	0.17	0.27	0.22	0.19	0.24	0.22	0.18	0.18	0.15	0.2	0	0.17	0.16	0.18	0.19	0.19		25.9514	25.9514	25.6832	25.7962	25.6014	25.7962	25.9514	25.6793	25.5635	25.6832	26.6401	25.6793	25.5635	25.9514
K2O	0.19	0.1988	0.0429418		10.7812	0.46798		4.63158		0.21	0.17	0.2	0.19	0.16	0.17	0.18	0.22	0.19	0.2	0.19	0.18	0.2	0.19	0.18	0.24	0.23	0.18	0.19	0.24	0.22	0.22	0.21	0.2	0.21		10.6396	10.9568	10.5827	10.6176	11.253	10.9568	10.7433	10.7867	10.6176	10.5827	10.6176	10.7433	10.5827	10.6176
Cr2O3	0.05	0.0032	0.032		497.853	75.6304		-93.6		0	0	0	0	0	0	0	0	0	0	0	0	0.08	0	0	0	0	0	0	0	0	0	0	0	0		490.29	490.29	490.29	490.29	490.29	490.29	490.29	490.29	490.29	490.29	490.29	490.29	679.366	490.29
Cl	0.03	0.0024	0.024		497.853	75.6304		-92		0	0	0	0	0	0	0	0	0	0	0	0.06	0	0	0	0	0	0	0	0	0	0	0	0	0		490.29	490.29	490.29	490.29	490.29	490.29	490.29	490.29	490.29	490.29	490.29	679.366	490.29	490.29
Total	100.287	99.6124								99.63	99.62	99.43	98.89	99.29	99.25	99.18	99.42	98.73	99.04	99.53	99.66	99.87	99.61	99.78	99.56	99.88	99.53	99.71	99.64	99.53	99.4	99.7	99.43	99.28
NMNH 72854	Published	This Study	This Study		This Study	This Study		This Study
Sample ID		Mean	2SD		Mean	2SD		Mean		17a	17b	17c	17d	17e	17f	17g	17h	17i	17j	32a	32b	32c	32d	32e	32f	32g	32h	32i	32j	32k	32m	32n	32o	32p		17a	17b	17c	17d	17e	17f	17g	17h	17i	17j	32a	32b	32c	32d
SiO2	76.71	77.1743	0.757027		0.489652	0.0154915		0.605202		77.63	77.36	77.27	77.35	77.32	77.56	77.41	77.42	77.58	77.25	77.46	77.52	77.6	77.55	77.45	76.67	76.77	76.81	76.48	76.65	76.62	77.1563	77.1	76.71	76.66		0.494315	0.482869	0.481172	0.482627	0.481982	0.490453	0.484276	0.484597	0.491494	0.480942	0.486012	0.488523	0.492585	0.489951
Al2O3	12.06	12.1005	0.173893		0.717252	0.0324423		0.336203		12.23	12.15	12.11	12.11	12.17	12.2	12.1	12.06	12.18	12.14	12.14	12.09	12.16	12.23	12.21	11.98	12.01	11.98	11.98	12.08	11.9	12.0937	12.01	12.14	12.06		0.734615	0.708565	0.704183	0.704183	0.712959	0.722233	0.704017	0.707077	0.715697	0.706915	0.706915	0.704224	0.71058	0.734615
K2O	4.89	5.00603	0.10894		1.08626	0.0371437		2.37288		4.93	4.98	4.96	4.97	5.01	4.92	4.91	4.95	4.95	4.92	5.05	5.06	5.05	5.01	5.02	5.06	5.05	5.07	5.03	5.04	5.07	5.01085	5.05	5.09	4.99		1.10693	1.07097	1.08125	1.07541	1.06622	1.11811	1.13054	1.08847	1.08847	1.11811	1.07993	1.08686	1.07993	1.06622
Na2O	3.75	3.61495	0.182575		2.52059	0.129952		-3.6014		3.6	3.58	3.59	3.58	3.51	3.56	3.5	3.48	3.49	3.39	3.77	3.69	3.72	3.67	3.65	3.67	3.76	3.71	3.65	3.61	3.63	3.61368	3.62	3.68	3.65		2.47559	2.48151	2.47796	2.48151	2.53892	2.49215	2.55163	2.5803	2.56543	2.75885	2.61334	2.50754	2.53905	2.49222
FeO(t)	1.16	1.13612	0.134976		5.9283	0.367543		-2.05832		1.17	1.13	1.24	1.15	1.14	1.18	1.17	1.16	1.17	1.17	1.18	1.12	1.15	1.21	1.18	1.19	1	0.96	1.19	1.09	1	1.12309	1.11	1.07	1.15		5.84947	5.82112	6.09012	5.82509	5.82055	5.86924	5.84947	5.83474	5.84947	5.84947	5.86924	5.82681	5.82509	5.95823
CaO	0.5	0.453318	0.049889		5.48987	0.444112		-9.33641		0.42	0.44	0.45	0.47	0.45	0.45	0.44	0.44	0.46	0.47	0.46	0.48	0.44	0.46	0.44	0.45	0.39	0.45	0.53	0.49	0.45	0.452948	0.45	0.44	0.46		5.58083	5.42217	5.39338	5.43956	5.39338	5.39338	5.42217	5.42217	5.39922	5.43956	5.39922	5.51366	5.42217	5.39922
Cl	0.13	0.110373	0.0318773		14.4132	0.795488		-15.0976		0.14	0.13	0.12	0.12	0.1	0.09	0.11	0.11	0.13	0.12	0.11	0.08	0.09	0.11	0.12	0.1	0.1	0.1	0.1	0.1	0.11	0.109327	0.1	0.11	0.15		15.0965	14.5724	14.252	14.252	14.2685	14.6047	14.1491	14.1491	14.5724	14.252	14.1491	15.1433	14.6047	14.1491
TiO2	0.12	0.0204	0.0845537		206.828	12.6074		-83		0	0	0	0	0	0.12	0	0	0	0	0.1	0	0.09	0	0.08	0	0	0	0	0	0	0	0	0	0.12		203.997	203.997	203.997	203.997	203.997	224.496	203.997	203.997	203.997	203.997	216.994	203.997	213.793	203.997
MgO	0.09	0	0					-100		0	0	0	0	0	0	0	0	0	0	0	0	0	0	0	0	0	0	0	0	0	0	0	0	0
MnO	0.03	0	0					-100		0	0	0	0	0	0	0	0	0	0	0	0	0	0	0	0	0	0	0	0	0	0	0	0	0
P2O5	0.009	0	0					-100		0	0	0	0	0	0	0	0	0	0	0	0	0	0	0	0	0	0	0	0	0	0	0	0	0
Total	99.449	99.616								100.12	99.77	99.74	99.75	99.7	100.08	99.64	99.62	99.96	99.46	100.27	100.04	100.3	100.24	100.15	99.12	99.08	99.08	98.96	99.06	98.78	98.97	99.44	99.24	99.24
Lipari Obsidian ID3506	Published	This Study	This Study		This Study	This Study		This Study
Sample ID		Mean	2SD		Mean	2SD		Mean		33a	33b	33c	33d	33e	33f	33g	33h	33i	33j	33k	33l	33m	33n	33o	33p	33q	33r	33s	33t	33u	33v	33w	33x	33y		33a	33b	33c	33d	33e	33f	33g	33h	33i	33j	33k	33l	33m	33n
SiO2	74.1	73.058	0.937746		0.640633	0.0292876		-1.40621		73.55	73.97	73.94	73.99	73.54	73.46	73.59	72.86	72.66	72.92	73.12	72.82	72.8	72.98	72.9	72.94	72.86	72.52	72.53	72.38	72.91	72.9	72.94	72.89	72.48		0.642535	0.674791	0.671911	0.676758	0.641989	0.638007	0.644828	0.631057	0.637827	0.629905	0.629035	0.632052	0.632617	0.629163
Al2O3	13.1	12.9028	0.231122		0.893907	0.0503795		-1.50534		13	13.09	13.2	13.13	12.88	12.89	13	12.93	12.84	12.79	12.84	12.9	12.76	12.91	12.95	12.95	12.91	12.77	12.79	12.8	12.91	12.91	12.89	12.78	12.75		0.889881	0.922508	0.986976	0.943036	0.878216	0.877747	0.889881	0.878505	0.882708	0.894124	0.882708	0.877542	0.903976	0.8776
K2O	5.1	5.284	0.0959166		0.905959	0.0440678		3.60784		5.39	5.31	5.29	5.34	5.28	5.32	5.29	5.32	5.27	5.32	5.38	5.25	5.28	5.31	5.31	5.28	5.23	5.3	5.22	5.2	5.25	5.26	5.22	5.25	5.23		0.972415	0.894497	0.889555	0.913242	0.8894	0.899258	0.889555	0.899258	0.890793	0.899258	0.958001	0.898185	0.8894	0.894497
Na2O	4.07	4.0112	0.0798582		0.993591	0.0512267		-1.44472		4.01	4.03	4.04	4.06	4.01	4	4.07	4.03	3.99	3.99	4.03	4	4.02	4.02	3.94	3.92	4.07	3.98	3.99	3.97	3.99	3.97	4.04	4.09	4.02		0.975346	0.97965	0.98544	1.00409	0.975346	0.976864	1.01682	0.97965	0.980821	0.980821	0.97965	0.976864	0.976277	0.976277
FeO(t)	1.55	1.558	0.117047		3.74881	0.232138		0.516129		1.58	1.63	1.57	1.53	1.57	1.55	1.69	1.53	1.6	1.42	1.44	1.57	1.58	1.5	1.56	1.58	1.66	1.53	1.56	1.49	1.58	1.59	1.54	1.56	1.54		3.69083	3.79038	3.68353	3.69727	3.68353	3.68181	4.03812	3.69727	3.71821	4.06978	3.96886	3.68353	3.69083	3.75214
CaO	0.73	0.7576	0.0717124		4.7245	0.206233		3.78082		0.74	0.76	0.8	0.79	0.83	0.78	0.79	0.73	0.76	0.71	0.69	0.73	0.8	0.73	0.77	0.74	0.73	0.77	0.69	0.8	0.79	0.74	0.78	0.75	0.74		4.65957	4.63766	4.76537	4.71248	5.00166	4.67336	4.71248	4.69196	4.63766	4.79816	4.95644	4.69196	4.76537	4.69196
Cl	0.34	0.3348	0.0516785		7.70193	0.506738		-1.52941		0.33	0.34	0.36	0.34	0.32	0.35	0.33	0.32	0.33	0.34	0.27	0.35	0.32	0.27	0.32	0.34	0.34	0.33	0.33	0.36	0.37	0.32	0.34	0.37	0.38		7.56711	7.56802	7.70461	7.56802	7.61142	7.61412	7.56711	7.61142	7.56711	7.56802	8.4611	7.61412	7.61142	8.4611
TiO2	0.074	0.0748	0.0507017		33.8274	1.83736		1.08108		0.07	0.07	0.07	0.07	0.09	0.11	0.06	0.11	0.03	0.01	0.11	0.09	0.05	0.04	0.06	0.08	0.09	0.11	0.1	0.09	0.07	0.08	0.07	0.08	0.06		33.2306	33.2306	33.2306	33.2306	33.4451	34.4654	33.4327	34.4654	35.223	37.3007	34.4654	33.4451	33.8374	34.4375
MnO	0.065	0.0604	0.046719		38.6048	1.82424		-7.07692		0.06	0.03	0.05	0.06	0.06	0.01	0.04	0.06	0.04	0.05	0.07	0.1	0.06	0.08	0.07	0.09	0.1	0.07	0.06	0.05	0.02	0.06	0.09	0.04	0.09		37.8935	39.1578	38.0435	37.8935	37.8935	41.2759	38.4679	37.8935	38.4679	38.0435	38.0213	40.0154	37.8935	38.424
MgO	0.041	0.038	0.0382971		50.3014	2.23136		-7.31707		0.04	0.02	0.03	0.05	0.07	0.04	0.03	0.04	0.03	0.02	0.01	0.07	0.06	0.03	0.05	0.02	0.02	0.02	0.01	0.05	0.04	0.06	0.08	0.03	0.03		49.3836	50.2391	49.5451	49.7597	52.0617	49.3836	49.5451	49.3836	49.5451	50.2391	51.4441	52.0617	50.6615	49.5451
Total	99.17	98.0796								98.77	99.25	99.35	99.36	98.65	98.51	98.89	97.93	97.55	97.57	97.96	97.88	97.73	97.87	97.93	97.94	98.01	97.4	97.28	97.19	97.93	97.89	97.99	97.84	97.32
NMNH 113498-1	Published	This Study	This Study		This Study	This Study		This Study
Sample ID		Mean	2SD		Mean	2SD		Mean		34a	34b	34c	34d	34e	34f	34g	34h	34i	34j	34k	34l	34m	34n	34o	34p	34q	34r	34s	34t	34u	34v	34w	34x	34y		34a	34b	34c	34d	34e	34f	34g	34h	34i	34j	34k	34l	34m	34n
SiO2	50.94	50.542	0.228181		0.225318	0.0113554		-0.781311		50.42	50.33	50.67	50.37	50.45	50.53	50.56	50.51	50.61	50.52	50.5	50.48	50.62	50.41	50.59	50.54	50.59	50.52	50.65	50.61	50.66	50.42	50.82	50.46	50.71		0.226183	0.235976	0.226682	0.231024	0.224036	0.221223	0.221284	0.221522	0.222742	0.221338	0.221773	0.222478	0.223235	0.227027
FeO(t)	13.3	13.4264	0.157362		0.584961	0.0272864		0.950376		13.46	13.29	13.31	13.42	13.58	13.39	13.36	13.39	13.54	13.52	13.43	13.46	13.35	13.3	13.42	13.58	13.41	13.42	13.5	13.46	13.38	13.36	13.48	13.43	13.42		0.576269	0.60776	0.59882	0.574252	0.616454	0.576632	0.58231	0.576632	0.597672	0.590229	0.5742	0.576269	0.58492	0.60313
Al2O3	12.5	12.3264	0.158732		0.642717	0.0296319		-1.3888		12.28	12.32	12.35	12.23	12.37	12.23	12.34	12.21	12.33	12.17	12.32	12.37	12.31	12.38	12.4	12.44	12.32	12.17	12.37	12.34	12.42	12.47	12.26	12.37	12.39		0.635168	0.630945	0.63198	0.64924	0.634666	0.64924	0.631234	0.657484	0.630889	0.678165	0.630945	0.634666	0.631403	0.636601
CaO	9.3	9.1164	0.111935		0.612779	0.0314775		-1.97419		9.09	9.15	9.13	9.25	9.05	9.09	9.12	9.1	9.08	9.07	9.19	9.15	9.22	9.09	9.06	9.12	9.09	9.2	9.02	9.07	9.05	9.14	9.12	9.11	9.15		0.60419	0.605842	0.602226	0.66665	0.618243	0.60419	0.601565	0.602548	0.60659	0.609741	0.622004	0.605842	0.641475	0.60419
MgO	5.08	5.0484	0.0838014		0.828497	0.0375317		-0.622047		5.06	5.04	5.09	5.11	5.06	5.02	4.98	5.06	5.02	5.12	5.01	5.06	4.99	5.03	5.04	4.99	5.02	5.14	5.02	5.05	5.05	5.09	5.1	5.01	5.05		0.814458	0.813865	0.829112	0.847688	0.814458	0.82066	0.855521	0.814458	0.82066	0.859463	0.826779	0.814458	0.844263	0.816346
TiO2	4.06	4.134	0.0885061		1.06849	0.0541084		1.82266		4.1	4.11	4.17	4.12	4.16	4.06	4.15	4.17	4.15	4.11	4.13	4.16	4.17	4.13	4.22	4.09	4.11	4.12	4.11	4.05	4.18	4.14	4.07	4.23	4.14		1.06117	1.055	1.06265	1.05094	1.05607	1.10603	1.05158	1.06265	1.05158	1.055	1.04901	1.05607	1.06265	1.04901
Na2O	2.66	2.7136	0.0613406		1.12826	0.048246		2.01504		2.75	2.7	2.75	2.69	2.66	2.68	2.69	2.73	2.71	2.72	2.65	2.77	2.72	2.71	2.73	2.75	2.75	2.73	2.74	2.73	2.69	2.68	2.72	2.68	2.71		1.13823	1.11176	1.13823	1.12047	1.17321	1.13372	1.12047	1.11373	1.10771	1.10837	1.19901	1.18004	1.10837	1.10771
K2O	0.82	0.8748	0.0436348		2.48924	0.137677		6.68293		0.85	0.89	0.89	0.83	0.89	0.88	0.85	0.87	0.88	0.88	0.86	0.9	0.87	0.93	0.88	0.9	0.87	0.84	0.86	0.89	0.86	0.88	0.85	0.88	0.89		2.50605	2.46725	2.46725	2.64195	2.46725	2.44638	2.50605	2.44597	2.44638	2.44638	2.46602	2.50806	2.44597	2.73908
P2O5	0.38	0.3944	0.081666		10.3353	0.406601		3.78947		0.45	0.39	0.39	0.41	0.39	0.37	0.33	0.42	0.44	0.34	0.41	0.39	0.44	0.45	0.37	0.4	0.43	0.36	0.41	0.37	0.35	0.42	0.32	0.47	0.34		10.514	10.1464	10.1464	10.1736	10.1464	10.2163	10.6375	10.2236	10.3943	10.4985	10.1736	10.1464	10.3943	10.514
MnO	0.15	0.2068	0.063435		74.4465	4.01921		37.8667		0.22	0.27	0.21	0.19	0.19	0.2	0.19	0.19	0.25	0.23	0.17	0.22	0.16	0.19	0.26	0.22	0.24	0.21	0.24	0.22	0.22	0.17	0.18	0.19	0.14		73.0827	73.7739	73.0827	75.3781	75.3781	74.3551	80.0829	77.0372	73.2004	73.2004	73.6263	73.2746	73.6263	73.0827
SO2	0.0399552	0.0432	0.054074		62.4696	3.20579		8.1211		0.04	0.02	0.04	0.08	0.08	0.07	0.11	0	0.05	0.05	0.06	0.03	0.06	0.04	0.07	0.06	0.04	0	0	0.03	0.03	0.02	0.02	0.05	0.03		61.3384	62.2191	61.3384	63.5562	63.5562	62.5165	68.4099	64.3809	61.3988	61.3988	61.7937	61.6133	61.7937	61.3384
Total	99.23	98.8264								98.72	98.51	99	98.7	98.88	98.52	98.68	98.64	99.06	98.73	98.73	98.99	98.91	98.66	99.04	99.09	98.87	98.69	98.9	98.82	98.89	98.79	98.94	98.88	98.97
NMNH 113716-1	Published	This Study	This Study		This Study	This Study		This Study
Sample ID		Mean	2SD		Mean	2SD		Mean		35a	35b	35c	35d	35e	35f	35g	35h	35i	35j	35k	35l	35m	35n	35o	35p	35q	35r	35s	35t	35u	35v	35w	35x	35y		35a	35b	35c	35d	35e	35f	35g	35h	35i	35j	35k	35l	35m	35n
SiO2	51.52	51.1228	0.24211		0.236383	0.00945387		-0.770963		51.02	51.15	51.07	50.97	51.02	51.05	51.11	51.2	51.07	51.26	51.36	51.25	51.12	51.12	51.18	51.32	51.09	51.27	51.17	51.3	51.08	51.04	50.97	50.92	50.96		0.235336	0.232243	0.232891	0.239299	0.235336	0.233683	0.232061	0.233891	0.232891	0.237904	0.249215	0.237084	0.232011	0.232011
Al2O3	15.39	15.0496	0.156895		0.884449	0.0345174		-2.21183		15.01	15.04	15.03	15.06	15.07	15.17	15.1	15.02	15.06	15.02	15.03	14.98	15.25	15.12	15	15.06	15.01	14.91	15.17	14.92	15.1	15.03	14.99	15.13	14.96		0.872016	0.88963	0.894542	0.874926	0.885205	0.884217	0.912121	0.877847	0.874301	0.868278	0.868404	0.877099	0.888523	0.870248
CaO	11.31	11.2364	0.0984683		0.520263	0.0289929		-0.650752		11.16	11.24	11.23	11.23	11.23	11.23	11.27	11.19	11.2	11.25	11.22	11.29	11.24	11.17	11.22	11.31	11.33	11.22	11.26	11.32	11.33	11.19	11.18	11.22	11.18		0.513328	0.510881	0.511366	0.510907	0.511419	0.534284	0.514933	0.512182	0.510907	0.512182	0.511366	0.518719	0.573621	0.518902
FeO(t)	9.12783	9.1888	0.162821		0.437388	0.0194293		0.667972		9.15	9.28	9.29	9.24	9.27	9.11	9.32	9.25	9.14	9.18	9.2	9.13	9.1	9.16	9.24	9.28	9.27	9.24	9.17	9.09	9.05	9.22	9.22	9.02	9.1		0.449546	0.42936	0.429459	0.429459	0.429459	0.429459	0.433301	0.436885	0.433989	0.429969	0.430267	0.439388	0.42936	0.444681
MgO	8.21	8.0404	0.137899		0.856041	0.0351843		-2.06577		8.08	8.08	8.03	7.94	8.08	7.94	8.18	8.06	8.02	8.03	8.15	7.99	7.96	8.13	8.03	7.98	8.12	8.03	8.14	8.06	7.96	8.05	7.99	7.94	8.04		0.845743	0.845743	0.840592	0.87517	0.845743	0.87517	0.906584	0.841568	0.841682	0.840592	0.881712	0.849155	0.862792	0.868167
Na2O	2.48	2.6592	0.0863944		3.62365	0.126477		7.22581		2.61	2.66	2.66	2.66	2.65	2.74	2.67	2.7	2.73	2.71	2.7	2.71	2.71	2.64	2.64	2.63	2.62	2.59	2.67	2.58	2.66	2.59	2.65	2.66	2.64		3.61187	3.61915	3.63989	3.63989	3.56186	3.58946	3.58946	3.56186	3.71222	3.67339	3.56433	3.55763	3.68373	3.61915
TiO2	1.3	1.3564	0.0984683		1.62158	0.070291		4.33846		1.4	1.31	1.41	1.41	1.37	1.39	1.39	1.37	1.43	1.42	1.34	1.35	1.29	1.31	1.31	1.32	1.3	1.46	1.33	1.31	1.38	1.31	1.39	1.31	1.3		1.63246	1.59163	1.59163	1.59163	1.59307	1.69952	1.59362	1.61982	1.67508	1.63512	1.61982	1.63512	1.63512	1.59791
SO2	0.299664	0.2716	0.066		14.3005	0.732585		-9.36516		0.27	0.26	0.22	0.21	0.28	0.25	0.26	0.29	0.23	0.28	0.31	0.28	0.27	0.3	0.3	0.31	0.35	0.25	0.27	0.27	0.21	0.31	0.26	0.27	0.28		14.5261	14.0484	14.0484	14.2901	14.1252	14.1252	14.1252	14.0484	14.2822	14.1252	14.0484	15.6315	14.1252	14.0484
MnO	0.17	0.1848	0.0529528		17.0247	1.03567		8.70588		0.22	0.19	0.19	0.21	0.17	0.17	0.17	0.19	0.16	0.17	0.19	0.12	0.17	0.19	0.15	0.2	0.19	0.2	0.17	0.23	0.23	0.17	0.2	0.22	0.15		17.3622	16.7264	16.7705	17.0569	16.9264	16.7705	16.7264	16.9264	16.7705	16.7705	18.8668	16.9264	16.7705	16.7705
P2O5	0.12	0.0836	0.0750289		44.7972	1.67239		-30.3333		0.04	0.11	0.03	0.12	0.06	0.03	0.12	0.07	0.14	0.11	0.08	0.11	0.05	0.08	0.11	0.02	0.1	0.1	0.08	0.14	0.14	0.02	0.08	0.06	0.09		45.1411	44.4011	45.7298	44.7886	44.3143	45.7298	44.7886	44.0827	45.9147	44.4011	43.9752	44.4011	44.668	43.9752
K2O	0.09	0.0968	0.0330252		12.1273	0.651271		7.55556		0.12	0.1	0.09	0.08	0.11	0.09	0.1	0.11	0.09	0.09	0.14	0.11	0.09	0.09	0.09	0.1	0.1	0.09	0.11	0.11	0.08	0.07	0.09	0.06	0.11		11.9053	11.9342	12.4742	12.7086	11.9202	12.0065	11.9342	11.9786	12.2779	11.9202	12.2234	11.9202	11.9053	12.0801
Total	100.017	99.2904								99.08	99.42	99.25	99.13	99.31	99.17	99.69	99.45	99.27	99.52	99.72	99.32	99.25	99.31	99.27	99.53	99.48	99.36	99.54	99.33	99.22	99	99.02	98.81	98.81
MINM25-53 Obsidian	Published	This Study	This Study		This Study	This Study		This Study
Sample ID		Mean	2SD		Mean	2SD		Mean		36a	36b	36c	36d	36e	36f	36g	36h	36i	36j	36k	36l	36m	36n	36o	36p	36q	36r	36s	36t	36u	36v	36w	36x	36y		36a	36b	36c	36d	36e	36f	36g	36h	36i	36j	36k	36l	36m	36n
SiO2	76.29	75.4332	0.425234		0.281327	0.0153508		-1.12308		75.29	75.53	75.24	75.44	75.17	75.14	75.49	75.22	75.33	75.52	75.92	75.44	75.48	75.33	75.24	75.25	75.56	75.45	75.3	75.27	75.46	75.71	75.39	75.73	75.93		0.278665	0.277311	0.280697	0.276172	0.284518	0.286494	0.276561	0.281674	0.277467	0.277087	0.303786	0.276172	0.276434	0.277467
Al2O3	13.03	12.8844	0.169025		0.654841	0.0205034		-1.11742		12.86	12.77	12.81	12.86	12.97	12.88	12.88	12.8	12.98	12.98	12.86	13	12.98	12.84	12.83	12.82	12.76	12.88	12.75	12.8	12.97	12.85	12.96	13.02	13		0.643747	0.665847	0.652576	0.643747	0.65575	0.64271	0.64271	0.655389	0.658943	0.658943	0.643747	0.666327	0.658943	0.646219
K2O	4.31	4.4036	0.0774338		0.877545	0.047784		2.17169		4.41	4.39	4.39	4.36	4.34	4.39	4.36	4.42	4.41	4.41	4.42	4.4	4.46	4.42	4.37	4.42	4.47	4.38	4.5	4.39	4.39	4.38	4.38	4.47	4.36		0.861918	0.863574	0.863574	0.88306	0.906818	0.863574	0.88306	0.864538	0.861918	0.861918	0.864538	0.861596	0.897319	0.864538
Na2O	3.74	3.8152	0.0889044		1.16303	0.0546009		2.0107		3.73	3.86	3.79	3.82	3.81	3.79	3.74	3.8	3.85	3.86	3.83	3.84	3.84	3.83	3.79	3.76	3.77	3.75	3.8	3.83	3.82	3.9	3.85	3.82	3.9		1.22272	1.16459	1.14892	1.14186	1.14191	1.14892	1.20527	1.14426	1.15552	1.16459	1.14413	1.14869	1.14869	1.14413
CaO	0.88	0.8772	0.0623217		3.54622	0.135076		-0.318182		0.93	0.92	0.83	0.87	0.86	0.84	0.9	0.88	0.87	0.89	0.93	0.88	0.89	0.85	0.85	0.89	0.86	0.83	0.84	0.91	0.85	0.86	0.9	0.87	0.93		3.67527	3.60968	3.63699	3.48426	3.50172	3.57853	3.51767	3.4811	3.48426	3.49228	3.67527	3.4811	3.49228	3.53326
FeO(t)	0.76	0.816	0.148661		9.09294	0.402989		7.36842		0.94	0.91	0.88	0.98	0.82	0.78	0.73	0.71	0.71	0.75	0.83	0.78	0.77	0.74	0.82	0.8	0.81	0.85	0.83	0.77	0.87	0.7	0.84	0.87	0.91		9.40949	9.20656	9.05664	9.75667	8.92559	8.96691	9.16128	9.28154	9.28154	9.06493	8.93141	8.96691	8.99328	9.11006
TiO2	0.11	0.1472	0.0593071		20.1096	0.868093		33.8182		0.09	0.16	0.14	0.15	0.17	0.16	0.18	0.19	0.12	0.19	0.19	0.15	0.14	0.13	0.12	0.14	0.09	0.13	0.18	0.18	0.1	0.15	0.13	0.16	0.14		21.1582	19.8116	19.7614	19.7416	19.9704	19.8116	20.216	20.5453	20.068	20.5453	20.5453	19.7416	19.7614	19.8706
MgO	0.1	0.1056	0.0600222		28.3524	2.35595		5.6		0.14	0.1	0.09	0.09	0.09	0.09	0.14	0.1	0.11	0.11	0.07	0.11	0.1	0.1	0.12	0.1	0.18	0.13	0.11	0.14	0.01	0.1	0.1	0.11	0.1		28.5689	27.8648	27.9957	27.9957	27.9957	27.9957	28.5689	27.8648	27.8574	27.8574	28.6196	27.8574	27.8648	27.8648
MnO	0.05	0.0488	0.0595315		62.9137	3.22963		-2.4		0	0.12	0.1	0.03	0.03	0.07	0.07	0.01	0.08	0.05	0.04	0.04	0.03	0.02	0.04	0.02	0.1	0.03	0.04	0.07	0.04	0.05	0.07	0.05	0.02		66.1356	68.2324	65.2005	62.2056	62.2056	62.3743	62.3743	63.6871	63.0706	61.7606	61.8509	61.8509	62.2056	62.8202
Total	99.27	98.5312								98.38	98.76	98.27	98.6	98.26	98.14	98.49	98.13	98.46	98.76	99.09	98.64	98.69	98.26	98.18	98.2	98.6	98.43	98.35	98.36	98.51	98.7	98.62	99.1	99.29
ATHO-G	Published	This Study	This Study		This Study	This Study		This Study
Sample name		Mean	2SD		Mean	2SD		Mean		37a	37b	37c	37d	37e	37f	37g	37h	37i	37j	37k	37l	37m	37n	37o	37p	37q	37r	37s	37t	37u	37v	37w	37x	37y		37a	37b	37c	37d	37e	37f	37g	37h	37i	37j	37k	37l	37m	37n
SiO2	75.6	74.0476	0.534611		0.360328	0.0180342		-2.05344		73.42	73.61	73.72	74.02	74.05	73.92	73.91	73.83	73.9	74.21	74.09	74.13	74.27	74.06	74.33	74.11	74.15	73.78	73.81	74.45	74.14	74.04	74.53	74.45	74.26		0.390809	0.372203	0.364185	0.353774	0.353699	0.355309	0.355571	0.358363	0.355852	0.356304	0.353876	0.354371	0.358569	0.353713
Al2O3	12.2	11.926	0.149555		0.625869	0.030418		-2.2459		11.83	11.78	11.82	11.86	11.94	11.95	11.96	12	12.1	11.88	11.84	11.98	12.01	11.91	11.94	11.88	11.92	11.93	12.03	12.02	11.88	11.88	11.94	11.89	11.98		0.634303	0.659591	0.638594	0.623857	0.614775	0.61561	0.616883	0.62628	0.67771	0.618983	0.630411	0.620728	0.629682	0.614907
Na2O	3.75	4.0972	0.19498		2.37523	0.103855		9.25867		4.08	3.96	3.92	4.09	4.11	4.21	4.11	4.23	4.12	3.96	4.11	4.08	3.95	4.17	4.08	4.1	3.93	4.22	4.09	4.14	4.03	4.23	4.09	4.27	4.15		2.33281	2.42209	2.48086	2.33161	2.33216	2.39306	2.33216	2.41646	2.33391	2.42209	2.33216	2.33281	2.4355	2.35726
FeO(t)	3.27	3.268	0.10583		1.61614	0.0865643		-0.0611621		3.19	3.28	3.14	3.34	3.28	3.23	3.26	3.31	3.18	3.24	3.31	3.37	3.29	3.28	3.28	3.24	3.25	3.3	3.26	3.27	3.19	3.31	3.27	3.32	3.31		1.65409	1.58811	1.76265	1.64426	1.58811	1.60278	1.5872	1.60637	1.67206	1.59535	1.60637	1.70046	1.59196	1.58811
K2O	2.64	2.678	0.0568624		1.05965	0.0576291		1.43939		2.65	2.68	2.67	2.66	2.66	2.72	2.68	2.66	2.71	2.68	2.67	2.7	2.72	2.7	2.69	2.61	2.68	2.68	2.64	2.66	2.68	2.66	2.65	2.7	2.74		1.06023	1.04031	1.04186	1.04853	1.04853	1.08473	1.04031	1.04853	1.06628	1.04031	1.04186	1.05261	1.08473	1.05261
CaO	1.7	1.7256	0.0523068		1.51282	0.0763529		1.50588		1.77	1.71	1.74	1.73	1.73	1.72	1.71	1.71	1.72	1.78	1.7	1.71	1.74	1.72	1.77	1.67	1.72	1.72	1.75	1.72	1.69	1.7	1.76	1.74	1.71		1.56838	1.49554	1.49398	1.48583	1.48583	1.48635	1.49554	1.49554	1.48635	1.60855	1.51322	1.49554	1.49398	1.48635
TiO2	0.255	0.2596	0.0638957		12.2837	0.633459		1.80392		0.33	0.27	0.22	0.28	0.25	0.27	0.23	0.29	0.26	0.28	0.2	0.28	0.26	0.23	0.22	0.29	0.25	0.27	0.24	0.28	0.25	0.28	0.28	0.29	0.19		13.1787	12.0835	12.4235	12.156	12.0797	12.0835	12.2635	12.2747	12.058	12.156	12.8711	12.156	12.058	12.2635
MnO	0.106	0.0548	0.126639		115.366	1.35753		-48.3019		0.12	0.12	0	0.13	0	0	0.13	0	0	0.12	0	0	0.12	0.14	0	0	0	0	0	0.12	0	0	0.13	0.11	0.13		115.591	115.591	114.898	116.366	114.898	114.898	116.366	114.898	114.898	115.591	114.898	114.898	115.591	117.246
MgO	0.103	0.042	0.115036		136.727	3.41089		-59.2233		0	0	0	0.1	0.11	0	0	0	0	0.11	0.13	0	0	0	0.11	0	0.13	0.13	0	0.12	0	0	0.11	0	0		135.607	135.607	135.607	136.887	137.887	135.607	135.607	135.607	135.607	137.887	140.332	135.607	135.607	135.607
P2O5	0.025									0	0	0	0	0	0	0	0	0	0	0	0	0	0	0	0	0	0	0	0	0	0	0	0	0
Total	99.649	98.0988								97.39	97.41	97.23	98.21	98.13	98.02	97.99	98.03	97.99	98.26	98.05	98.25	98.36	98.21	98.42	97.9	98.03	98.03	97.82	98.78	97.86	98.1	98.76	98.77	98.47
GOR132-G	Published	This Study	This Study		This Study	This Study		This Study
Sample name		Mean	2SD		Mean	2SD		Mean		38a	38b	38c	38d	38e	38f	38g	38h	38i	38j	38k	38l	38m	38n	38o	38p	38q	38r	38s	38t	38u	38v	38w	38x	38y		38a	38b	38c	38d	38e	38f	38g	38h	38i	38j	38k	38l	38m	38n
SiO2	45.5	45.9656	0.210244		0.228259	0.0128216		1.0233		45.86	46.09	45.86	46.18	45.88	45.92	45.9	45.73	46.01	45.94	45.97	45.99	46.02	45.99	45.86	46.1	46.2	45.97	45.88	46.05	45.93	45.92	45.93	46.01	45.95		0.228562	0.230277	0.228562	0.242029	0.227034	0.22492	0.225818	0.245591	0.224876	0.224343	0.224085	0.224319	0.225276	0.224319
MgO	22.4	21.9664	0.184561		0.419346	0.019167		-1.93571		21.94	22.05	21.99	21.84	22.02	22	21.91	21.86	21.97	21.89	22.01	21.96	22.08	22.15	21.88	21.99	21.76	22.08	22.06	21.85	21.89	22.05	21.93	22.05	21.95		0.412284	0.418323	0.412149	0.4268	0.414383	0.412702	0.414679	0.42243	0.411623	0.417224	0.413447	0.41165	0.423921	0.443049
Al2O3	11	11.0484	0.138164		0.624096	0.0329349		0.44		11.08	10.95	11.1	11.02	11.09	11.06	11.07	11.05	11.03	10.98	10.98	11.17	11.02	11.12	11	11.22	11.03	10.94	11.04	10.98	11.02	11.08	11.04	11.16	10.98		0.615197	0.637048	0.619444	0.614705	0.617069	0.612981	0.613833	0.612641	0.613505	0.62455	0.62455	0.649547	0.614705	0.625679
FeO(t)	10.1	10.1992	0.155018		0.758633	0.0308038		0.982178		10.08	10.13	10.21	10.27	10.22	10.35	10.17	10.31	10.09	10.1	10.13	10.16	10.07	10.19	10.29	10.19	10.2	10.2	10.26	10.28	10.16	10.24	10.15	10.21	10.32		0.779078	0.756395	0.744888	0.756942	0.745672	0.799067	0.746713	0.77448	0.773639	0.768643	0.756395	0.748404	0.78495	0.744809
CaO	8.45	8.4816	0.10578		0.62245	0.0299515		0.373964		8.5	8.57	8.47	8.57	8.41	8.5	8.39	8.47	8.48	8.44	8.55	8.43	8.51	8.45	8.42	8.43	8.46	8.46	8.5	8.6	8.48	8.49	8.46	8.54	8.46		0.612464	0.644269	0.611573	0.644269	0.633017	0.612464	0.646654	0.611573	0.610995	0.61851	0.631123	0.622525	0.614503	0.615338
Na2O	0.83	0.8572	0.0701237		4.08265	0.21242		3.27711		0.84	0.84	0.87	0.88	0.84	0.87	0.87	0.89	0.85	0.8	0.86	0.84	0.83	0.91	0.83	0.88	0.93	0.82	0.88	0.92	0.87	0.78	0.85	0.83	0.85		4.02691	4.02691	4.01832	4.04144	4.02691	4.01832	4.01832	4.07729	4.01102	4.21589	4.00815	4.02691	4.05566	4.18574
Cr2O3	0.37	0.3992	0.056839		7.10604	0.353271		7.89189		0.33	0.39	0.41	0.36	0.4	0.36	0.38	0.44	0.43	0.41	0.41	0.41	0.36	0.44	0.44	0.4	0.41	0.36	0.42	0.42	0.39	0.4	0.4	0.42	0.39		7.75962	6.9899	6.99542	7.23623	6.97538	7.23623	7.03876	7.25755	7.1375	6.99542	6.99542	6.99542	7.23623	7.25755
TiO2	0.306	0.318	0.0465475		7.30437	0.437764		3.92157		0.28	0.34	0.31	0.33	0.38	0.33	0.33	0.32	0.34	0.32	0.32	0.3	0.31	0.31	0.27	0.31	0.3	0.33	0.3	0.32	0.32	0.29	0.35	0.34	0.3		7.54415	7.29814	7.18787	7.209	8.12664	7.209	7.209	7.17198	7.29814	7.17198	7.17198	7.25633	7.18787	7.18787
MnO	0.154	0.1452	0.122355		42.0437	2.93416		-5.71429		0.14	0	0.17	0.17	0.16	0.17	0.14	0.14	0.16	0.13	0.25	0	0.21	0.15	0.13	0.14	0	0.17	0.21	0.18	0.17	0.18	0.14	0.15	0.17		41.2879	45.7035	41.4176	41.4176	41.3303	41.4176	41.2879	41.2879	41.3303	41.3329	43.6412	45.7035	42.1995	41.287
NiO	0.1187	0.1388	0.185321		66.6457	2.34931		16.9334		0.2	0.17	0.23	0.15	0.24	0	0.2	0.17	0	0.16	0.17	0.18	0.24	0.17	0	0.16	0.25	0	0	0	0.2	0.17	0.17	0.24	0		65.9787	65.558	66.6668	65.4288	66.9543	68.2864	65.9787	65.558	68.2864	65.4782	65.558	65.6681	66.9543	65.558
K2O	0.0308	0.0032	0.032		497.853	75.6304		-89.6104		0.08	0	0	0	0	0	0	0	0	0	0	0	0	0	0	0	0	0	0	0	0	0	0	0	0		679.366	490.29	490.29	490.29	490.29	490.29	490.29	490.29	490.29	490.29	490.29	490.29	490.29	490.29
P2O5	0.03									0	0	0	0	0	0	0	0	0	0	0	0	0	0	0	0	0	0	0	0	0	0	0	0	0
Total	99.2895	99.5228								99.33	99.53	99.62	99.77	99.64	99.56	99.36	99.38	99.36	99.17	99.65	99.44	99.65	99.88	99.12	99.82	99.54	99.33	99.55	99.6	99.43	99.6	99.42	99.95	99.37
TG-1	Published	This Study	This Study		This Study	This Study		This Study
Sample name		Mean	2SD		Mean	2SD		Mean		39a	39b	39c	39d	39e	39f	39g	39h	39i	39j	39k	39l	39m	39n	39o	39p	39q	39r	39s	39t	39u	39v	39w	39x	39y		39a	39b	39c	39d	39e	39f	39g	39h	39i	39j	39k	39l	39m	39n
SiO2	58.6	58.4188	0.22762		0.194465	0.00922556		-0.309215		58.42	58.32	58.33	58.4	58.45	58.32	58.53	58.25	58.53	58.57	58.41	58.48	58.38	58.51	58.51	58.53	58.35	58.37	58.52	58.57	58.56	58.38	58.24	58.14	58.4		0.190881	0.193741	0.193195	0.190985	0.191168	0.193741	0.194497	0.199115	0.194497	0.197515	0.190904	0.191983	0.191325	0.193321
Al2O3	17.1	17.5324	0.194103		0.552467	0.032957		2.52865		17.61	17.54	17.69	17.35	17.48	17.56	17.53	17.45	17.53	17.36	17.55	17.46	17.47	17.59	17.48	17.54	17.79	17.47	17.6	17.55	17.53	17.48	17.44	17.65	17.61		0.549273	0.542438	0.570302	0.579478	0.545529	0.543249	0.542378	0.550147	0.542378	0.575635	0.542728	0.548384	0.546844	0.546185
CaO	7.1	7.0612	0.123467		0.872611	0.0469807		-0.546479		7.04	7.01	7.07	7.13	7.2	7.06	7.12	7.08	6.98	7.05	7.1	7.08	6.92	7.14	6.99	7.07	7.03	7.12	7.1	6.96	7.05	7.01	7.05	7.07	7.1		0.858618	0.86832	0.856946	0.877651	0.939345	0.856604	0.872026	0.858187	0.885787	0.857162	0.863349	0.858187	0.9421	0.884114
FeO(t)	6.44	6.398	0.202237		1.57765	0.071863		-0.652174		6.46	6.45	6.62	6.24	6.28	6.39	6.32	6.57	6.42	6.31	6.45	6.26	6.57	6.47	6.28	6.38	6.39	6.32	6.36	6.32	6.39	6.45	6.33	6.4	6.52		1.56016	1.55672	1.69146	1.62251	1.59022	1.54874	1.56689	1.63583	1.55001	1.57186	1.55672	1.60528	1.63583	1.56419
MgO	3.75	3.6812	0.13258		1.79746	0.0892788		-1.83467		3.62	3.71	3.69	3.68	3.8	3.69	3.54	3.75	3.54	3.71	3.64	3.67	3.68	3.75	3.77	3.63	3.67	3.59	3.68	3.74	3.73	3.75	3.65	3.63	3.72		1.79425	1.77104	1.76501	1.76439	1.87446	1.76501	1.91805	1.80205	1.91805	1.77104	1.77798	1.76539	1.76439	1.80205
Na2O	3.13	3.0564	0.110737		1.80848	0.065531		-2.35144		3.03	3.09	3.1	3.04	3.05	3.14	3.02	3.06	3.11	3.11	3.15	3.01	3.1	3.03	2.96	3.07	3.01	2.98	2.98	3.07	3.02	2.98	3.04	3.12	3.14		1.78302	1.788	1.79687	1.77807	1.77543	1.85425	1.79026	1.77511	1.80797	1.80797	1.87382	1.79975	1.79687	1.78302
K2O	1.96	2.024	0.0754983		1.86172	0.0864637		3.26531		2.03	2.06	1.97	2.03	2.01	2.04	2.03	1.95	1.98	2.08	2.04	2.01	2.01	1.98	2.07	2.03	2.02	2.1	1.98	2	2.01	2.03	2.05	2	2.09		1.82832	1.86039	1.90083	1.82832	1.83242	1.83396	1.82832	1.96303	1.87647	1.90625	1.83396	1.83242	1.83242	1.87647
TiO2	0.755	0.758	0.0785281		5.16837	0.394253		0.397351		0.78	0.81	0.74	0.76	0.78	0.71	0.77	0.72	0.82	0.8	0.78	0.63	0.75	0.76	0.79	0.76	0.72	0.78	0.75	0.71	0.78	0.75	0.75	0.77	0.78		5.10712	5.25059	5.09662	5.07556	5.10712	5.22503	5.08479	5.16965	5.32277	5.19033	5.10712	6.06021	5.07952	5.07556
P2O5	0.168	0.192	0.083865		21.7988	1.16261		14.2857		0.17	0.18	0.2	0.21	0.15	0.11	0.18	0.15	0.22	0.21	0.19	0.22	0.2	0.22	0.19	0.21	0.25	0.2	0.29	0.14	0.18	0.13	0.15	0.27	0.18		21.5163	21.4337	21.4142	21.4774	21.8244	22.9794	21.4337	21.8244	21.5889	21.4774	21.3996	21.5889	21.4142	21.5889
MnO	0.127	0.1492	0.065554		21.9296	0.960451		17.4803		0.15	0.2	0.13	0.16	0.1	0.1	0.15	0.12	0.1	0.16	0.17	0.15	0.15	0.12	0.12	0.16	0.15	0.13	0.18	0.22	0.12	0.19	0.17	0.2	0.13		21.5249	22.5366	21.6721	21.5714	22.4752	22.4752	21.5249	21.8642	22.4752	21.5714	21.6976	21.5249	21.5249	21.8642
Total	99.13	99.2712								99.31	99.37	99.54	99	99.3	99.12	99.19	99.1	99.23	99.36	99.48	98.97	99.23	99.57	99.16	99.38	99.38	99.06	99.44	99.28	99.37	99.15	98.87	99.25	99.67
StHs6/80-G	Published	This Study	This Study		This Study	This Study		This Study
Sample name		Mean	2SD		Mean	2SD		Mean		40a	40b	40c	40d	40e	40f	40g	40h	40i	40j	40k	40l	40m	40n	40o	40p	40q	40r	40s	40t	40u	40v	40w	40x	40y		40a	40b	40c	40d	40e	40f	40g	40h	40i	40j	40k	40l	40m	40n
SiO2	63.7	62.7156	0.362311		0.288341	0.0126298		-1.54537		63.01	62.31	62.78	62.44	62.79	62.88	62.77	62.76	62.6	62.99	62.55	62.82	62.95	62.52	62.66	62.83	62.96	62.52	62.68	62.53	62.68	62.83	62.81	62.65	62.57		0.297613	0.310137	0.283732	0.295847	0.283971	0.287648	0.283527	0.283357	0.285316	0.295738	0.287715	0.284893	0.292354	0.289551
Al2O3	17.8	17.9572	0.197697		0.549496	0.0237083		0.883146		18.15	17.96	17.9	18.1	18.02	18.01	17.96	17.99	17.89	17.94	17.93	18.08	17.81	18.05	17.99	17.88	18.08	17.76	17.9	17.88	17.95	17.81	18.03	18.02	17.84		0.57899	0.539353	0.542951	0.56144	0.543688	0.542419	0.539353	0.540533	0.544315	0.539672	0.540162	0.555769	0.562794	0.548785
CaO	5.28	5.2776	0.0917024		0.867309	0.0320858		-0.0454545		5.26	5.26	5.33	5.32	5.33	5.34	5.31	5.22	5.29	5.22	5.23	5.34	5.27	5.18	5.32	5.26	5.34	5.23	5.27	5.23	5.24	5.32	5.28	5.3	5.25		0.853745	0.853745	0.873223	0.865695	0.873223	0.882253	0.859708	0.877734	0.852482	0.877734	0.869419	0.882253	0.851704	0.925279
Na2O	4.44	4.468	0.141774		1.58303	0.119594		0.630631		4.47	4.47	4.57	4.44	4.49	4.45	4.54	4.58	4.5	4.46	4.24	4.47	4.41	4.52	4.52	4.5	4.48	4.56	4.48	4.44	4.37	4.45	4.42	4.48	4.39		1.55452	1.55452	1.61769	1.55935	1.5575	1.55651	1.5863	1.63038	1.56083	1.5549	1.84879	1.55452	1.57521	1.57117
FeO(t)	4.37	4.3552	0.0879621		1.00805	0.0451524		-0.338673		4.43	4.37	4.4	4.3	4.34	4.29	4.34	4.41	4.36	4.3	4.37	4.4	4.31	4.26	4.38	4.35	4.36	4.39	4.36	4.4	4.35	4.39	4.36	4.38	4.28		1.04521	0.99169	1.0098	1.02019	0.991813	1.03209	0.991813	1.01976	0.989685	1.02019	0.99169	1.0098	1.01017	1.07832
MgO	1.97	1.9144	0.0671019		1.74934	0.087091		-2.82234		1.87	1.9	1.88	1.93	1.91	1.92	1.94	1.91	1.92	1.9	1.88	1.89	1.94	1.91	1.91	1.96	1.96	1.87	1.9	1.95	1.88	1.88	1.89	2	1.96		1.77637	1.72347	1.75294	1.72457	1.71774	1.71811	1.73706	1.71774	1.71811	1.72347	1.75294	1.73525	1.73706	1.71774
K2O	1.29	1.3316	0.0524976		1.96779	0.0804714		3.22481		1.38	1.3	1.33	1.3	1.3	1.34	1.36	1.38	1.32	1.33	1.38	1.36	1.35	1.33	1.32	1.33	1.31	1.32	1.32	1.31	1.34	1.32	1.36	1.3	1.3		2.05874	1.98668	1.93154	1.98668	1.98668	1.93535	1.97617	2.05874	1.93894	1.93154	2.05874	1.97617	1.95032	1.93154
TiO2	0.703	0.6928	0.0623217		4.49028	0.151044		-1.45092		0.69	0.68	0.72	0.66	0.66	0.71	0.73	0.72	0.72	0.64	0.69	0.65	0.73	0.73	0.72	0.68	0.65	0.66	0.67	0.75	0.67	0.68	0.73	0.69	0.69		4.40765	4.42181	4.4737	4.50369	4.50369	4.43376	4.53101	4.4737	4.4737	4.65351	4.40765	4.57045	4.53101	4.53101
P2O5	0.164	0.136	0.141067		51.7652	2.78028		-17.0732		0.19	0.19	0.18	0.18	0.18	0.17	0	0.16	0.17	0.16	0.15	0.16	0.15	0.15	0.18	0	0.16	0.17	0.18	0	0	0	0.19	0.18	0.15		51.4083	51.4083	51.2097	51.2097	51.2097	51.0511	54.4683	50.9329	51.0511	50.9329	50.8552	50.9329	50.8552	50.8552
MnO	0.076	0.018	0.0842615		233.568	15.985		-76.3158		0	0	0	0	0	0	0	0	0	0	0	0	0.11	0	0	0	0.12	0	0	0	0	0	0.11	0.11	0		230.168	230.168	230.168	230.168	230.168	230.168	230.168	230.168	230.168	230.168	230.168	230.168	250.28	230.168
Total	99.793	98.8664								99.45	98.44	99.09	98.67	99.02	99.11	98.95	99.13	98.77	98.94	98.42	99.17	99.03	98.65	99	98.79	99.42	98.48	98.76	98.49	98.48	98.68	99.18	99.11	98.43
[truncated: 36 more columns]
