# Supplementary material for: Optimizing SEM-EDX for fast, high-quality and non-destructive elemental analysis of glass
Source: Royal Society of Chemistry journal article supplement (doi:10.1039/d4ja00212a), 2024-01-01
Supplement: d4ja00212a6.xlsx [file d4ja00212a6.xlsx]

## Sheet: LGdM
Locality	Lago Grande di Monticcio	Lago Grande di Monticcio	Lago Grande di Monticcio	Lago Grande di Monticcio	Lago Grande di Monticcio	Lago Grande di Monticcio	Lago Grande di Monticcio	Lago Grande di Monticcio	Lago Grande di Monticcio	Lago Grande di Monticcio	Lago Grande di Monticcio	Lago Grande di Monticcio	Lago Grande di Monticcio	Lago Grande di Monticcio	Lago Grande di Monticcio	Lago Grande di Monticcio	Lago Grande di Monticcio	Lago Grande di Monticcio	Lago Grande di Monticcio	Lago Grande di Monticcio	Lago Grande di Monticcio	Lago Grande di Monticcio	Lago Grande di Monticcio	Lago Grande di Monticcio	Lago Grande di Monticcio	Lago Grande di Monticcio	Lago Grande di Monticcio	Lago Grande di Monticcio	Lago Grande di Monticcio	Lago Grande di Monticcio	Lago Grande di Monticcio	Lago Grande di Monticcio	Lago Grande di Monticcio	Lago Grande di Monticcio	Lago Grande di Monticcio	Lago Grande di Monticcio	Lago Grande di Monticcio	Lago Grande di Monticcio	Lago Grande di Monticcio
Sample ID	TM24-3b_P1	TM24-3b_P2	TM24-3b_P3	TM24-3b_P4	TM24-3b_P5	TM24-3b_P6	TM24-3b_P7	TM24-3b_P8	TM24-3b_P9	TM24-3b_P10	TM24-3b_P11	TM24-3b_P12	TM24-3b_P13	TM24-3b_P14	TM24-3b_P15	TM24-3b_P16	TM24-3b_P17	TM24-3b_P18	TM24-3b_P19	TM24-3b_P20	TM24-3b_P21	TM24-3b_P22	TM24-3b_P23	TM24-3b_P24	TM24-3b_P25	TM24-3b_P26	TM24-3b_P27	TM24-3b_P28	TM24-3b_P29	TM24-3b_P30	TM24-3b_V1	TM24-3b_V2	TM24-3b_V3	TM24-3b_V4	TM24-3b_V5	TM24-3b_V6	TM24-3b_V7	TM24-3b_V8	TM24-3b_V9
	This study: Tescan S8000	This study: Tescan S8000	This study: Tescan S8000	This study: Tescan S8000	This study: Tescan S8000	This study: Tescan S8000	This study: Tescan S8000	This study: Tescan S8000	This study: Tescan S8000	This study: Tescan S8000	This study: Tescan S8000	This study: Tescan S8000	This study: Tescan S8000	This study: Tescan S8000	This study: Tescan S8000	This study: Tescan S8000	This study: Tescan S8000	This study: Tescan S8000	This study: Tescan S8000	This study: Tescan S8000	This study: Tescan S8000	This study: Tescan S8000	This study: Tescan S8000	This study: Tescan S8000	This study: Tescan S8000	This study: Tescan S8000	This study: Tescan S8000	This study: Tescan S8000	This study: Tescan S8000	This study: Tescan S8000	This study: Tescan Tiger	This study: Tescan Tiger	This study: Tescan Tiger	This study: Tescan Tiger	This study: Tescan Tiger	This study: Tescan Tiger	This study: Tescan Tiger	This study: Tescan Tiger	This study: Tescan Tiger
SiO2	59.61	59.35	57.43	57.4	58.77	57.17	57.29	59.29	58.34	59.01	58.4	58.82	58.82	59.2822	56.63	60.05	59.79	59.26	60.08	59.42	60.29	58.48	59.57	60.38	61.41	59.65	60.92	58.28	60.27	56.9	58.53	58.35	59.13	59.59	59.1	58.69	58.23	59.7	59.06
TiO2	0.61	0.57	0.55	0.55	0.63	0.56	0.55	0.63	0.61	0.6	0.53	0.55	0.57	0.500556	0.49	0.59	0.6	0.58	0.64	0.6	0.57	0.59	0.57	0.64	0.56	0.62	0.56	0.57	0.55	0.54	0.63	0.59	0.6	0.59	0.62	0.58	0.59	0.58	0.6
Al2O3	17.35	17.13	16.55	16.64	17.03	16.51	16.4	17.12	16.79	17.11	16.87	17.06	16.96	17.0244	16.31	17.37	17.21	17.19	17.39	17.12	17.51	17.06	17.52	17.41	17.71	17.2	17.52	16.82	17.43	16.39	17.31	17.25	17.47	17.58	17.49	17.32	17.19	17.69	17.41
FeO(t)	2.93	2.84	2.69	2.72	2.83	2.69	2.85	2.87	2.79	2.81	2.85	2.79	2.79	2.84318	2.73	2.92	2.84	2.86	2.84	2.81	2.86	2.79	2.78	2.89	2.95	2.83	2.86	2.78	2.89	2.81	2.73	2.69	2.79	2.81	2.77	2.77	2.77	2.9	2.73
MnO	0.25	0.27	0.28	0.25	0.28	0.3	0.33	0.27	0.25	0.28	0.28	0.28	0.32	0.206598	0.27	0.34	0.33	0.3	0.31	0.25	0.26	0.29	0.27	0.28	0.28	0.32	0.3	0.3	0.28	0.27	0.3	0.3	0.27	0.31	0.33	0.27	0.28	0.29	0.31
MgO	0.35	0.3	0.3	0.33	0.29	0.28	0.3	0.3	0.29	0.31	0.31	0.29	0.29	0.215579	0.28	0.3	0.27	0.28	0.31	0.29	0.28	0.34	0.29	0.29	0.37	0.33	0.31	0.27	0.23	0.3	0.27	0.3	0.3	0.3	0.28	0.29	0.28	0.28	0.27
CaO	0.96	0.96	0.89	0.94	1	0.91	0.93	1.07	0.97	0.92	0.93	0.96	0.97	0.979392	0.85	0.94	0.98	0.93	1	0.97	0.97	0.89	0.95	0.95	1.04	1	1.02	0.94	0.95	0.87	0.96	0.97	1.01	0.98	0.97	0.99	0.94	0.94	1
Na2O	7.84	7.49	7.28	7.28	7.51	7.3	7.27	7.56	7.23	7.58	7.36	7.54	7.52	7.38693	7.16	7.71	7.59	7.78	7.74	7.6	7.77	7.37	7.63	7.67	7.93	7.71	7.96	7.54	7.66	7.43	7.37	7.35	7.48	7.54	7.47	7.41	7.23	7.59	7.4
K2O	5.82	6.09	5.74	5.64	5.73	5.58	5.73	5.65	6	5.93	5.8	5.91	5.84	5.84237	5.55	5.98	6	5.78	5.99	6.13	5.91	5.78	5.82	6.12	6.4	5.99	6.06	5.72	6.02	5.48	5.86	5.82	5.87	5.94	5.96	5.9	6.09	6.12	5.94
P2O5	0	0	0	0	0	0	0	<LOD	<LOD	<LOD	<LOD	<LOD	<LOD	<LOD	<LOD	<LOD	<LOD	<LOD	<LOD	<LOD	<LOD	<LOD	<LOD	<LOD	<LOD	<LOD	<LOD	<LOD	<LOD	<LOD
Cl	0.51	0.65	0.66	0.65	0.64	0.63	0.74	0.66	0.66	0.63	0.65	0.64	0.63	0.51	0.64	0.69	0.67	0.7	0.64	0.69	0.67	0.63	0.63	0.63	0.66	0.65	0.67	0.65	0.71	0.65
Total	96.23	95.65	92.37	92.4	94.71	91.93	92.39	95.42	93.93	95.18	93.98	94.84	94.71	94.7912	90.91	96.89	96.28	95.66	96.94	95.88	97.09	94.22	96.03	97.26	99.31	96.3	98.18	93.87	96.99	91.64	93.96	93.62	94.92	95.64	94.99	94.22	93.6	96.09	94.72
SiO2	61.9453	62.0491	62.1739	62.1212	62.0526	62.1886	62.0089	62.1358	62.1101	61.9983	62.1409	62.0202	62.1054	62.5398	62.2924	61.9775	62.1001	61.9486	61.9765	61.9733	62.097	62.0675	62.0327	62.081	61.8367	61.9418	62.0493	62.0859	62.1404	62.0908	62.2925	62.3264	62.2946	62.3066	62.2171	62.2904	62.2115	62.1293	62.3522
TiO2	0.633898	0.595923	0.595431	0.595238	0.665188	0.609159	0.595303	0.660239	0.64942	0.630385	0.56395	0.579924	0.601837	0.528062	0.538995	0.608938	0.623182	0.606314	0.660202	0.625782	0.587084	0.626194	0.593565	0.65803	0.563891	0.643821	0.570381	0.607223	0.567069	0.589262	0.670498	0.630207	0.632111	0.616897	0.6527	0.615581	0.630342	0.603601	0.633446
Al2O3	18.0297	17.909	17.9171	18.0087	17.9812	17.9593	17.7508	17.9417	17.875	17.9765	17.9506	17.9882	17.9073	17.9599	17.9408	17.9275	17.8749	17.9699	17.9389	17.8557	18.0348	18.1066	18.2443	17.9005	17.833	17.8609	17.8448	17.9184	17.9709	17.8852	18.4227	18.4256	18.405	18.3814	18.4125	18.3825	18.3654	18.4098	18.3805
FeO(t)	3.04479	2.96916	2.9122	2.94372	2.98807	2.92614	3.08475	3.00776	2.9703	2.9523	3.03256	2.9418	2.94583	2.99942	3.00297	3.01373	2.94973	2.98976	2.92965	2.93075	2.94572	2.96115	2.89493	2.97142	2.9705	2.93873	2.91302	2.96154	2.97969	3.06635	2.90549	2.87332	2.93932	2.9381	2.9161	2.93993	2.9594	3.018	2.88218
MnO	0.259794	0.282279	0.303129	0.270563	0.295639	0.326335	0.357182	0.28296	0.266156	0.294179	0.297936	0.295234	0.337874	0.217951	0.296997	0.350913	0.34275	0.313611	0.319785	0.260743	0.267793	0.30779	0.281162	0.287888	0.281945	0.332295	0.305561	0.319591	0.28869	0.294631	0.319285	0.320444	0.28445	0.324132	0.347405	0.286563	0.299145	0.3018	0.32728
MgO	0.363712	0.313643	0.324781	0.357143	0.306198	0.30458	0.32471	0.314399	0.308741	0.325699	0.329857	0.305778	0.306198	0.227425	0.307997	0.309629	0.280432	0.292703	0.319785	0.302461	0.288392	0.360858	0.301989	0.29817	0.372571	0.342679	0.315747	0.287632	0.237138	0.327368	0.287356	0.320444	0.316056	0.313676	0.294768	0.30779	0.299145	0.291393	0.285051
CaO	0.99761	1.00366	0.963516	1.01732	1.05585	0.989884	1.0066	1.12136	1.03268	0.96659	0.989572	1.01223	1.02418	1.03321	0.934991	0.970172	1.01786	0.972193	1.03157	1.01168	0.999073	0.944598	0.989274	0.976763	1.04723	1.03842	1.03891	1.00138	0.979482	0.949367	1.02171	1.0361	1.06405	1.02468	1.02116	1.05073	1.00427	0.97825	1.05574
Na2O	8.14715	7.83063	7.88135	7.87879	7.92947	7.94082	7.86882	7.92287	7.69722	7.96386	7.83145	7.95023	7.94003	7.79285	7.87592	7.95748	7.88326	8.13297	7.98432	7.92657	8.00288	7.82212	7.94543	7.88608	7.9851	8.00623	8.10756	8.03239	7.89772	8.10781	7.84376	7.85089	7.88032	7.88373	7.86399	7.86457	7.72436	7.89884	7.8125
K2O	6.04801	6.36696	6.21414	6.1039	6.05005	6.06984	6.20197	5.92119	6.38774	6.2303	6.17153	6.23155	6.16619	6.16341	6.10494	6.17195	6.23182	6.04223	6.17908	6.39341	6.08714	6.13458	6.06061	6.29241	6.44447	6.22015	6.17234	6.09353	6.20683	5.97992	6.2367	6.21662	6.18416	6.21079	6.27434	6.26194	6.50641	6.36903	6.27111
P2O5	0	0	0	0	0	0	0	<LOD	<LOD	<LOD	<LOD	<LOD	<LOD	<LOD	<LOD	<LOD	<LOD	<LOD	<LOD	<LOD	<LOD	<LOD	<LOD	<LOD	<LOD	<LOD	<LOD	<LOD	<LOD	<LOD
Cl	0.52998	0.679561	0.714518	0.703463	0.675747	0.685304	0.800952	0.691679	0.702651	0.661904	0.691637	0.674821	0.665188	0.538025	0.703993	0.712148	0.695887	0.731758	0.660202	0.71965	0.690081	0.668648	0.656045	0.647748	0.664586	0.674974	0.68242	0.692447	0.732034	0.709297
Total	96.23	95.65	92.37	92.4	94.71	91.93	92.39	95.42	93.93	95.18	93.98	94.84	94.71	94.7912	90.91	96.89	96.28	95.66	96.94	95.88	97.09	94.22	96.03	97.26	99.31	96.3	98.18	93.87	96.99	91.64	93.96	93.62	94.92	95.64	94.99	94.22	93.6	96.09	94.72

## Sheet: PdM SM21
Locality	Pomici di Base Sm21	Pomici di Base Sm21	Pomici di Base Sm21	Pomici di Base Sm21	Pomici di Base Sm21	Pomici di Base Sm21	Pomici di Base Sm21	Pomici di Base Sm21	Pomici di Base Sm21	Pomici di Base Sm21	Pomici di Base Sm21	Pomici di Base Sm21	Pomici di Base Sm21	Pomici di Base Sm21	Pomici di Base Sm21	Pomici di Base Sm21	Pomici di Base Sm21	Pomici di Base Sm21	Pomici di Base Sm21	Pomici di Base Sm21	Pomici di Base Sm21	Pomici di Base Sm21	Pomici di Base Sm21	Pomici di Base Sm21	Pomici di Base Sm21	Pomici di Base Sm21	Pomici di Base Sm21	Pomici di Base Sm21	Pomici di Base Sm21	Pomici di Base Sm21	Pomici di Base Sm21	Pomici di Base Sm21	Pomici di Base Sm21	Pomici di Base Sm21	Pomici di Base Sm21	Pomici di Base Sm21	Pomici di Base Sm21	Pomici di Base Sm21	Pomici di Base Sm21	Pomici di Base Sm21
Sample ID	SM21-P1	SM21-P2	SM21-P3	SM21-P4	SM21-P5	SM21-P6	SM21-P7	SM21-P8	SM21-P9	SM21-P10	SM21-P11	SM21-P12	SM21-P13	SM21-P14	SM21-P15	SM21-P16	SM21-P17	SM21-P18	SM21-P19	SM21-P20	SM21-P21	SM21-P22	SM21-P23	SM21-P24	SM21-P25	SM21-P26	SM21-P27	SM21-P28	SM21-P29	SM21-P30	SM21-P31	SM21-P32	SM21-P33	SM21-P34	SM21-P35	SM21-P36	SM21-P37	SM21-P38	SM21-P39	SM21-P40
	This study: Tescan S8000	This study: Tescan S8000	This study: Tescan S8000	This study: Tescan S8000	This study: Tescan S8000	This study: Tescan S8000	This study: Tescan S8000	This study: Tescan S8000	This study: Tescan S8000	This study: Tescan S8000	This study: Tescan S8000	This study: Tescan S8000	This study: Tescan S8000	This study: Tescan S8000	This study: Tescan S8000	This study: Tescan S8000	This study: Tescan S8000	This study: Tescan S8000	This study: Tescan S8000	This study: Tescan S8000	This study: Tescan S8000	This study: Tescan S8000	This study: Tescan S8000	This study: Tescan S8000	This study: Tescan S8000	This study: Tescan S8000	This study: Tescan S8000	This study: Tescan S8000	This study: Tescan S8000	This study: Tescan S8000	This study: Tescan S8000	This study: Tescan S8000	This study: Tescan S8000	This study: Tescan S8000	This study: Tescan S8000	This study: Tescan S8000	This study: Tescan S8000	This study: Tescan S8000	This study: Tescan S8000	This study: Tescan S8000
SiO2	54.9	54.97	54.56	54.08	54.22	55.41	54.13	55.3	54.81	55.18	53.73	55.74	55	56.11	54.11	54.88	54.93	54.1	54.96	53.9	55.78	54.83	54.38	54.84	54.76	54.83	54.98	53.88	53.88	54.45	53.94	54.28	54.27	54.72	55	53.89	53.95	54.64	54.71	54.24
TiO2	0.59	0.54	0.59	0.61	0.55	0.63	0.56	0.62	0.49	0.5	0.61	0.58	0.59	0.61	0.57	0.53	0.55	0.66	0.43	0.57	0.49	0.54	0.52	0.67	0.68	0.65	0.49	0.57	0.64	0.65	0.57	0.53	0.49	0.56	0.59	0.53	0.54	0.59	0.57	0.56
Al2O3	18.52	18.18	18.23	17.67	17.87	17.31	18.21	18.05	19	17.85	17.12	18.35	17.93	18.72	18.77	18.39	17.97	18.25	18.11	16.97	18.05	18.12	18.53	18.44	18.54	18.69	18.65	17.5	17.57	17.36	18.1	17.34	17.74	18.35	18.24	18.11	17.87	18.74	18.53	17.45
Cr2O3	<LOD	<LOD	<LOD	<LOD	<LOD	<LOD	<LOD	<LOD	<LOD	<LOD	<LOD	<LOD	<LOD	<LOD	<LOD	<LOD	<LOD	<LOD	<LOD	<LOD	<LOD	<LOD	<LOD	<LOD	<LOD	<LOD	<LOD	<LOD	<LOD	<LOD	<LOD	<LOD	<LOD	<LOD	<LOD	<LOD	<LOD	<LOD	<LOD	<LOD
FeO(t)	6.3	6.03	6.07	6.28	6.42	7.75	6.3	7.22	6.06	6.51	6.33	6.38	6.9	5.32	5.51	5.86	6.23	6.83	5.42	6.39	6.52	7.03	6.19	6.34	6.17	6.03	5.7	6.49	6.55	7.09	6.4	6.32	5.85	5.38	5.42	5.63	6.36	5.3	5.71	6.19
MnO	<LOD	<LOD	<LOD	0.21	<LOD	0.23	<LOD	0.21	0.24	<LOD	0.21	<LOD	<LOD	<LOD	<LOD	<LOD	0.21	<LOD	<LOD	0.24	<LOD	0.23	<LOD	<LOD	<LOD	0.21	<LOD	<LOD	<LOD	<LOD	0.23	<LOD	<LOD	<LOD	<LOD	<LOD	<LOD	<LOD	<LOD	<LOD
MgO	0.92	0.78	0.81	0.8	0.73	0.75	0.94	0.8	0.58	0.88	1.15	0.76	0.8	0.59	0.62	0.77	0.88	0.85	0.42	0.81	0.65	0.58	0.84	0.85	0.84	0.81	0.61	0.82	0.97	1.09	0.87	0.79	0.67	0.87	0.9	0.8	0.88	0.99	0.65	0.61
CaO	4.98	4.57	4.93	4.82	4.7	3.97	4.98	4.3	4.97	4.17	5.69	4.08	4.26	4.41	4.44	4.46	3.83	4.94	4.6	3.58	3.78	4.62	5.07	4.44	4.51	4.56	4.43	5.64	4.9	4.86	5.29	4.32	5.24	4.97	5.03	4.74	4.92	5.44	4.29	3.79
Na2O	3.22	3.11	2.86	3.18	3.24	3.14	3.49	3.13	3.29	3.47	3.03	3.28	2.97	3.1	3.52	3.16	3.55	3.22	3.78	3.65	3.71	3.28	3.55	3.58	3.55	3.62	3.08	3.03	2.89	3.38	3.1	3.41	3.1	2.91	2.89	2.87	3.4	2.67	3.47	3.37
K2O	7.54	8.06	7.56	8.59	8.28	8.24	7.35	7.57	7.53	8.2	7.7	8.12	7.86	8.4	7.18	8	8.58	7.01	7.56	8.17	8.32	7.49	7.08	7.32	7.19	7.1	7.86	8.12	8.21	7.5	7.52	8.2	8.14	8.14	8.18	7.71	7.63	7.61	7.88	8.26
P2O5	0.51	0.39	0.7	0.66	0.54	0.37	0.4	0.48	0.53	0.39	0.5	0.48	0.6	0.58	0.44	0.48	0.49	0.56	0.64	0.49	0.49	0.47	0.42	0.53	0.53	0.48	0.47	0.49	0.41	0.51	0.47	0.49	0.53	0.38	0.42	0.45	0.49	0.36	0.74	0.78
SO2	<LOD	<LOD	<LOD	<LOD	<LOD	<LOD	<LOD	<LOD	<LOD	<LOD	<LOD	<LOD	<LOD	<LOD	<LOD	<LOD	<LOD	<LOD	<LOD	0.23	<LOD	<LOD	<LOD	<LOD	<LOD	<LOD	<LOD	<LOD	<LOD	<LOD	<LOD	<LOD	<LOD	<LOD	<LOD	<LOD	<LOD	<LOD	<LOD	<LOD
Cl	0.62	0.58	0.53	0.64	0.68	0.85	0.62	0.72	0.71	0.71	0.54	0.57	0.6	0.73	0.53	0.58	0.73	0.68	0.59	0.71	0.8	0.81	0.62	0.73	0.68	0.64	0.57	0.67	0.66	0.64	0.61	0.6	0.66	0.57	0.55	0.52	0.59	0.49	0.64	0.82
Total	98.1	97.21	96.84	97.54	97.23	98.65	96.98	98.4	98.21	97.86	96.61	98.34	97.51	98.57	95.69	97.11	97.95	97.1	96.51	95.71	98.59	98	97.2	97.74	97.45	97.62	96.84	97.21	96.68	97.53	97.1	96.28	96.69	96.85	97.22	95.25	96.63	96.83	97.19	96.07
SiO2	55.9633	56.5477	56.3404	55.4439	55.7647	56.1683	55.8156	56.1992	55.809	56.3867	55.6154	56.6809	56.4045	56.924	56.5472	56.5132	56.0796	55.7158	56.9475	56.316	56.5777	55.949	55.9465	56.108	56.1929	56.1668	56.7741	55.4264	55.7302	55.829	55.551	56.3772	56.1278	56.4997	56.5727	56.5774	55.8315	56.4288	56.2918	56.4588
TiO2	0.601427	0.555498	0.609252	0.625384	0.565669	0.638621	0.577439	0.630081	0.498931	0.510934	0.631405	0.589791	0.605066	0.61885	0.595674	0.545773	0.561511	0.679712	0.44555	0.595549	0.497008	0.55102	0.534979	0.685492	0.697794	0.665847	0.505989	0.586359	0.661978	0.666462	0.587024	0.550478	0.506774	0.578214	0.606871	0.55643	0.558833	0.609315	0.58648	0.582908
Al2O3	18.8787	18.7018	18.8249	18.1156	18.3791	17.5469	18.7771	18.3435	19.3463	18.2403	17.7207	18.6598	18.3879	18.9916	19.6154	18.9373	18.3461	18.7951	18.7649	17.7306	18.3081	18.4898	19.0638	18.8664	19.0251	19.1457	19.2586	18.0023	18.1734	17.7997	18.6406	18.01	18.3473	18.9468	18.7616	19.0131	18.4932	19.3535	19.0657	18.1638
Cr2O3	<LOD	<LOD	<LOD	<LOD	<LOD	<LOD	<LOD	<LOD	<LOD	<LOD	<LOD	<LOD	<LOD	<LOD	<LOD	<LOD	<LOD	<LOD	<LOD	<LOD	<LOD	<LOD	<LOD	<LOD	<LOD	<LOD	<LOD	<LOD	<LOD	<LOD	<LOD	<LOD	<LOD	<LOD	<LOD	<LOD	<LOD	<LOD	<LOD	<LOD
FeO(t)	6.42202	6.20307	6.26807	6.43838	6.6029	7.85606	6.49618	7.3374	6.17045	6.65236	6.55212	6.4877	7.0762	5.39718	5.75818	6.03439	6.36039	7.03399	5.616	6.67642	6.61325	7.17347	6.36831	6.4866	6.33145	6.17701	5.886	6.67627	6.77493	7.26956	6.59114	6.56419	6.05026	5.55498	5.57498	5.91076	6.58181	5.47351	5.87509	6.44322
MnO	<LOD	<LOD	<LOD	0.215296	<LOD	0.233147	<LOD	0.213415	0.244374	<LOD	0.217369	<LOD	<LOD	<LOD	<LOD	<LOD	0.214395	<LOD	<LOD	0.250757	<LOD	0.234694	<LOD	<LOD	<LOD	0.21512	<LOD	<LOD	<LOD	<LOD	0.236869	<LOD	<LOD	<LOD	<LOD	<LOD	<LOD	<LOD	<LOD	<LOD
MgO	0.937819	0.802387	0.836431	0.820176	0.750797	0.760264	0.969272	0.813008	0.590571	0.899244	1.19035	0.772829	0.820429	0.598559	0.647926	0.792915	0.898418	0.875386	0.435188	0.846307	0.659296	0.591837	0.864198	0.869654	0.861981	0.829748	0.629905	0.843535	1.00331	1.1176	0.895984	0.820523	0.692936	0.898296	0.925735	0.839895	0.91069	1.02241	0.668793	0.634954
CaO	5.07645	4.70116	5.09087	4.94156	4.8339	4.02433	5.13508	4.36992	5.06058	4.26119	5.88966	4.14887	4.36878	4.47398	4.63998	4.59273	3.91016	5.08754	4.76635	3.74047	3.83406	4.71429	5.21605	4.54266	4.62801	4.67117	4.57456	5.80187	5.06827	4.98308	5.44799	4.48691	5.41938	5.13165	5.17383	4.97638	5.09159	5.61809	4.41403	3.94504
Na2O	3.28236	3.19926	2.95333	3.2602	3.3323	3.18297	3.59868	3.18089	3.34996	3.54588	3.13632	3.33537	3.04584	3.14497	3.67855	3.25404	3.6243	3.31617	3.91669	3.8136	3.76306	3.34694	3.65226	3.66278	3.64289	3.70826	3.1805	3.11696	2.98924	3.4656	3.19258	3.54175	3.20612	3.00465	2.97264	3.01312	3.51858	2.75741	3.57033	3.50786
K2O	7.68603	8.29133	7.80669	8.80664	8.51589	8.35276	7.57888	7.69309	7.66724	8.37932	7.97019	8.25707	8.06071	8.52186	7.5034	8.23808	8.75957	7.21936	7.83339	8.5362	8.43899	7.64286	7.28395	7.48926	7.37814	7.2731	8.11648	8.35305	8.49193	7.68994	7.74459	8.51683	8.41866	8.40475	8.41391	8.09449	7.8961	7.85913	8.10783	8.5979
P2O5	0.519878	0.401193	0.722842	0.676645	0.555384	0.375063	0.412456	0.487805	0.53966	0.398529	0.517545	0.488103	0.615322	0.588414	0.459818	0.494285	0.500255	0.576725	0.663144	0.511963	0.497008	0.479592	0.432099	0.542255	0.543869	0.491703	0.485337	0.504063	0.424079	0.522916	0.484037	0.508932	0.548144	0.392359	0.43201	0.472441	0.507089	0.371786	0.761395	0.811908
SO2	<LOD	<LOD	<LOD	<LOD	<LOD	<LOD	<LOD	<LOD	<LOD	<LOD	<LOD	<LOD	<LOD	<LOD	<LOD	<LOD	<LOD	<LOD	<LOD	0.240309	<LOD	<LOD	<LOD	<LOD	<LOD	<LOD	<LOD	<LOD	<LOD	<LOD	<LOD	<LOD	<LOD	<LOD	<LOD	<LOD	<LOD	<LOD	<LOD	<LOD
Cl	0.632008	0.596646	0.547295	0.656141	0.699373	0.861632	0.639307	0.731707	0.722941	0.725526	0.558948	0.579622	0.615322	0.74059	0.553872	0.597261	0.745278	0.700309	0.611336	0.741824	0.811441	0.826531	0.63786	0.746879	0.697794	0.655603	0.5886	0.68923	0.682664	0.656208	0.628218	0.623182	0.682594	0.588539	0.565727	0.545932	0.610576	0.506042	0.658504	0.853544
Total	98.1	97.21	96.84	97.54	97.23	98.65	96.98	98.4	98.21	97.86	96.61	98.34	97.51	98.57	95.69	97.11	97.95	97.1	96.51	95.71	98.59	98	97.2	97.74	97.45	97.62	96.84	97.21	96.68	97.53	97.1	96.28	96.69	96.85	97.22	95.25	96.63	96.83	97.19	96.07

## Sheet: Laki 1783-84 AD
	SiO2	TiO2	Al2O3	FeO(t)	MnO	MgO	CaO	Na2O	K2O	P2O5	Total	Analytical Method	Study
Laki/6-b	49.74	2.89	13.05	13.39	0.2	5.33	9.85	2.89	0.43	0.32	98.09	WDS-EMPA	Rosca (2018)
Laki/1	50.4	2.5	13.9	13.8	0.2	5.4	9.4	2.8	0.45	0.39	99.24	FE-SEM-EDX	Rosca et al. (2019)
Laki/2	50.1	2.6	13.8	13.9	0.2	5.3	9.2	2.7	0.46	0.36	98.62	FE-SEM-EDX	Rosca et al. (2019)
Laki/3	50.5	2.6	14	14.2	0.2	5.4	9.4	2.8	0.45	0.37	99.92	FE-SEM-EDX	Rosca et al. (2019)
Laki/4	50.3	2.6	13.8	14.2	0.2	5.5	9.4	2.8	0.5	0.35	99.65	FE-SEM-EDX	Rosca et al. (2019)
Laki/5	50.2	2.6	13.9	13.7	0.2	5.3	9.3	2.7	0.44	0.38	98.72	FE-SEM-EDX	Rosca et al. (2019)
Laki/6	50.6	3.1	13.2	13.8	0.2	5.4	9.6	2.8	0.43	0.37	99.5	FE-SEM-EDX	Rosca et al. (2019)
Laki/7	50.2	3	13	13.7	0.2	5.3	9.5	2.7	0.45	0.37	98.42	FE-SEM-EDX	Rosca et al. (2019)
Laki/8	50.2	3	12.9	13.8	0.2	5.2	9.4	2.4	0.42	0.36	97.88	FE-SEM-EDX	Rosca et al. (2019)
Laki/9	50.3	3.1	13	14	0.3	6.9	9.6	2.8	0.43	0.38	100.81	FE-SEM-EDX	Rosca et al. (2019)
	49.3145	2.96545	12.98	13.4755	0.238182	5.46091	9.40545	0.706364	0.548182	0.291111	95.3327	FE-SEM-EDX	Blennerhasset et al. (in review)
	50.3111	2.78889	13.5	13.9	0.211111	5.52222	9.42222	2.72222	0.447778	0.37	99.1956	FE-SEM-EDX	Rosca (2018)
	50.64	2.07	13.16	13.85	0.03	6.59	10.2	2.81	0.18	-	99.53	SEM-EDS	Kekonen et al. (2005)
	52.22	2.93	13.11	13.385		5.44	9.565	2.31	0.595	0.28	99.83	AASEM-EDS	Fiacco et al. (1994)
	49.81	2.95	12.72	13.5	0.22	5.29	9.63	2.26	0.5	0.35	97.19	WDS-EMPA	Reilly & Mitchell (2015)
	49.94	3.05	13.2	14.2	0.22	5.4	9.9	2.77	0.45	0.32	99.5	WDS-EMPA	Thordarson et al. (1996)
