# Supplementary figures and images for: Optimizing SEM-EDX for fast, high-quality and non-destructive elemental analysis of glass
Source: Royal Society of Chemistry journal article supplement (doi:10.1039/d4ja00212a), 2024-01-01

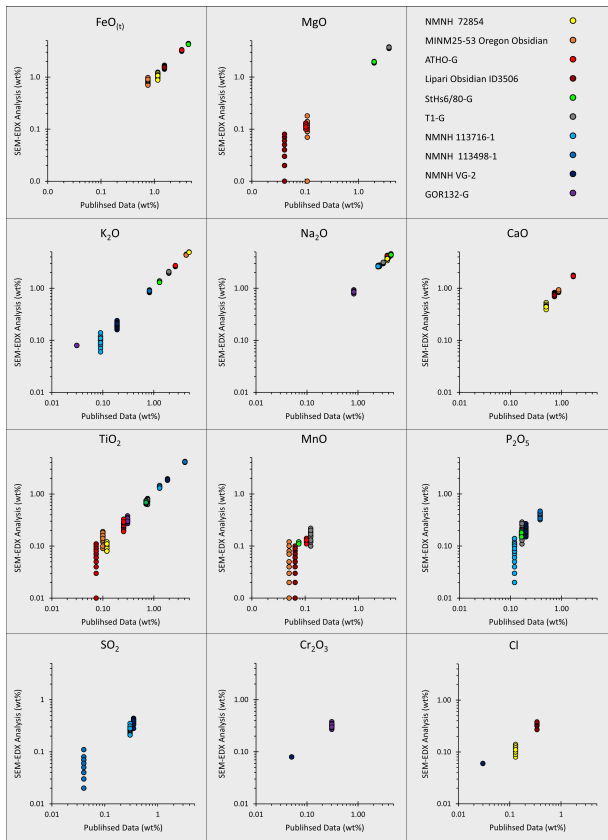

Supplement: d4ja00212a1.pdf [file d4ja00212a1.pdf]

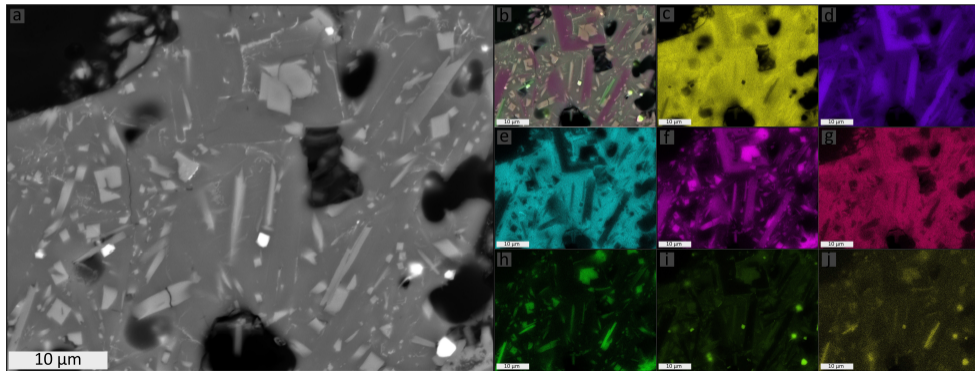

Supplement: d4ja00212a3.pdf [file d4ja00212a3.pdf]
